# Supplementary material for: Evolutionary Change in Locomotion Close to the Origin of Amniotes Inferred From Trackway Data in an Ancestral State Reconstruction Approach
Source: Frontiers journal article supplement (doi:10.3389/fevo.2021.674779), 2021-05-07
Supplement: Table_2.XLSX [file Table_2.XLSX]

## Sheet: Input_data_and_results
I. Input data
Abbreviations: pL = pes length, max.pL = pes length for the trackway with the longest pes imprints, pIV = length of pedal digit IV, Sp = pedal stride length, Pp = pedal pace length, Gp = pedal gauge width, Gm= manual gauge width, GAD = glenoacetabular distance, Dpm = distance between successive pes and manus imprints (in the direction of movement),
Pap = pace angulation for the pes imprints, Pam = pes angulation for the manus imprints, Oap = Orientation of the pes imprints with respect to the direction of movement (trackway midline; positive values indicate inward rotation), Oam = orientation of the manus imprints.
			Abundance of	Body size proxies			Ratios (PL for normalization)						Angles		Minus = outward orientation
Taxonomic units	Middle specimen	Age (Ma)	Drag marks	max.pL	pL	pIV	Sp/pL	Pp/pL	Gp/pL	(Gp-Gm)/pL	GAD/pL	Dpm/pL	Pap	Pam	Oap	Oam	Oam-Oap
1. Batrachichnus isp. (McAlester Fm) TM	NMMNH P-31676/77-F2	308.5	0	23.5	15.5	11	4.35484	3.22581	2.34194	0.425806	3.16129	0.967742	89	94	4	7.3	3.3
2. Batrachichnus salamandroides (Thuringian Forest) TM	MNG-VF-4307/-4314	294	0.0909091	21	17	10.9	3.65294	3.01765	2.37647	0.794118	3.07647	1.07059	72.5	96.6	2.4	14.7	12.3
3. Limnopus vagus (Pittsburgh Fm/Howard Fm) TM	YPM 207	301.5	0.333333	124	124	72.5	4.22177	3.25242	2.46532	0.220968	3.2621	1.02016	87.5	93.5	5.3	42	36.7
4. Hylopus isp. (Mauch Chunk Fm) TM	NMMNH P-64276	327	NA	57	57	35.3	4.17544	2.68421	1.67193	0.222807	2.78421	0.785965	99.7	108.5	-9.4	12.4	21.8
5. Amphisauropus kablikae (Thuringian Forest) TM	MNG-JF-52-3-F1	294	0.434783	71	15.5	8.5	3.85161	3.09677	2.43226	0.690323	3.08387	1.08387	76.5	99.8	-15.3	27.3	42.6
6. Matthewichnus caudifer (Pottsville Fm) TM	ALMNH-UCM 469	318.5	1	18.7	18.7	14.5	2.36364	2.17112	1.77005	0.534759	3.04813	1.9893	65.7	87.1	-27.5	-3.5	24
7. Matthewichnus caudifer (Robledo Mts. Fm) TM	NMMNH P-23312	288.5	NA	19.3	10.8	6.8	2.43519	2.2963	1.92593	0.416667	4.62963	3.28704	67.3	86.7	-17	16	33
8. Ichniotherium praesidentis (Bochum Fm) TM	DBM 060003309001-4	314.5	NA	150.3	150.33	86.36	2.86483	2.81348	2.41642	0.113085	3.1973	1.76492	60.94	63.56	-28	-5.11	22.89
9. Ichniotherium sphaerodactylum (Thuringian Forest) TM	MNG-1840-F1	288.5	0.030303	128.3	100.6	49.9	3.22763	2.48012	1.91054	0.178926	2.70577	1.11431	81	88.2	5.6	24.5	18.9
10. Ichniotherium cottae (Salop Fm) TM	LMG 2471	310	NA	117.8	117.8	54	3.33192	2.15789	1.37182	-0.220713	2.41341	0.749576	102.3	92	-12.3	4.2	16.5
11. Ichniotherium cottae TM (Pittsburgh Fm)	CMC VP-3052	301.5	NA	157.9	148.7	74	3.65165	2.42771	1.57835	0.216543	2.95898	1.12979	97.5	108	-11.8	25.3	37.1
12. Ichniotherium cottae TM (Maroon Fm)	DMNS 50618	294.5	0	130.7	130.7	66	3.55394	2.17292	1.26243	-0.147666	2.44836	0.763581	101	94.5	-8.5	11.3	19.8
13. Ichniotherium cottae (Thuringian Forest, GB type) TM	MNG-1386-F1	294.5	0	133	133	72	3.03759	2.29323	1.71053	-0.0827068	2.25564	0.913534	85	84	14	31	17
14. Ichniotherium cottae (Thuringian Forest, Brom type) TM	MB.ICV.3-F2	288.5	0.0833333	84	73	42.8	4.47945	2.78082	1.63014	0.205479	3.19178	0.876712	111	115	9.7	21.5	11.8
15. Dimetropus isp. (Bochum Fm) TM	DBM 060003260001-5	314.5	NA	140.3	140.3	72.7	2.14041	1.80756	1.36707	0.00427655	2.0727	1.02423	71.2	74.6	-2.6	0.7	3.3
16. Tambachichnium schmidti (Thuringian Forest) TM	PMJ-P-1321-F1	288.5	0	93	76	54	5.21053	3.03947	1.55263	0.00657895	2.31096	-1.12763	123	124	-14.7	-4	10.7
17. Dimetropus leisnerianus (Thuringian Forest) TM	MNG-1828-F2	288.5	0.625	92	67	33.5	3.98955	2.5806	1.68657	-0.358209	3.30448	1.32836	95.8	87.1	-5.5	-0.5	5
18. Erpetopus willistoni (Choza Fm) TM	NMMNH P-32411	276	0	14	11	9.3	7.72727	5.18182	3.36364	0.636364	4.36364	0.481818	98	109	17.7	39	21.3
19. Varanopus microdactylus (Thuringian Forest) TM	MNG-1841	292	0	30	30	20.3	4.08333	3.16667	2.39	0.2	3.38333	1.29333	90.5	90.5	-1	9.7	10.7
20. Hyloidichnus bifurcatus (Rabejac Fm/ Hermit Fm) TM	USNM 11518	285.5	0	85	43	32.8	3.93721	2.65116	1.71628	0.0651163	3.17442	1.25581	95.7	105	17.2	28.8	11.6
21. Notalacerta missouriensis (McAlester Fm) TM	NMMNH P-31759	309	1	23	19.8	16.1	3.59091	2.31313	1.4596	-0.020202	3.0202	1.25253	102.4	100.7	5	8.3	3.3
22. Dromopus lacertoides (Thuringian Forest) TM	MNG-VF-2010	293.5	0	58.5	58.5	39.5	3.55556	2.28205	1.41026	0.0547009	2.41026	0.581197	105	110	-14.3	7	21.3
II. Reconstructed ancestral states
Tree A: Diadectomorpha as sistergoup to Amniota and Varanopidae as Pelycosauria
complete tree	(1+2+3)+(4+(5+((6+7)+((8+(9+(10+11+12+(13+14))))+((15+(16+17))+(18+((19+20)+(21+22))))))))	353	0.446258	47.588	37.171	23.63	3.649	2.714	1.955	0.333	2.978	1.169	84.961	95.857	-9.886	11.166	21.052
A. Temnospondyli	1+2+3	314	0.100059	36.413	27.719	18.342	4.166	3.163	2.348	0.424	3.159	1.011	85.902	94.403	3.031	17.055	14.024
B. Lepospondyli	6+7	323	0.639262	21.641	19.73	14.552	2.525	2.247	1.805	0.49	3.192	2.012	68.263	87.928	-24.248	0.239	24.487
C. Reptiliomorpha	4+(5+((6+7)+((8+(9+(10+11+12+(13+14))))+((15+(16+17))+(18+((19+20)+(21+22)))))))	350	0.446258	48.553	37.998	24.084	3.61	2.68	1.925	0.327	2.965	1.181	84.89	95.966	-10.854	10.725	21.579
D. Batrachosauria	5+((6+7)+((8+(9+(10+11+12+(13+14))))+((15+(16+17))+(18+((19+20)+(21+22))))))	347	0.592674	48.554	36.924	23.4	3.5	2.646	1.927	0.333	2.974	1.243	82.969	94.509	-12.005	10.074	22.078
E. (derived Reptiliomorpha)	(6+7)+((8+(9+(10+11+12+(13+14))))+((15+(16+17))+(18+((19+20)+(21+22)))))	344	0.639262	47.541	37.652	24.052	3.371	2.586	1.902	0.319	2.977	1.313	81.406	92.757	-12.972	8.466	21.438
F. Cotylosauria	(8+(9+(10+11+12+(13+14))))+((15+(16+17))+(18+((19+20)+(21+22))))	326	0.295374	82.084	74.461	44.175	3.285	2.504	1.821	0.085	2.81	1.153	82.862	85.835	-9.361	5.386	14.748
G. Diadectomorpha	8+(9+(10+11+12+(13+14)))	320	0.295374	116.066	110.604	61.302	3.16	2.56	1.96	0.056	2.888	1.309	78.525	79.777	-15.539	3.799	19.338
H. Diadectidae	9+(10+11+12+(13+14))	317	0.0190528	119.866	114.023	59.902	3.258	2.45	1.781	0.011	2.758	1.139	85.948	85.594	-11.831	7.865	19.696
I. (derived Diadectidae)	10+11+12+(13+14)	314	0.0190528	122.908	119.109	59.671	3.36	2.336	1.588	-0.053	2.633	0.971	93.892	91.136	-9.958	10.179	20.137
J. (derived Diadectidae)	13+14	299	0.0269608	116.316	111.481	60.607	3.474	2.427	1.664	-0.003	2.574	0.916	93.52	93.429	7.899	24.222	16.324
K. Amniota	(15+(16+17))+(18+((19+20)+(21+22)))	323	0.446906	75.247	68.04	41.278	3.334	2.463	1.738	0.062	2.745	1.049	85.261	87.771	-5.702	5.694	11.396
L. Pelycosauria	15+(16+17)	320	0.446906	93.625	86.013	49.547	3.084	2.29	1.609	0.02	2.538	0.945	83.242	85.391	-5.163	3.306	8.469
M. (derived Pelycosauria)	16+17	317	0.3125	93.428	83.264	48.249	3.347	2.38	1.61	-0.014	2.585	0.798	87.791	88.897	-6.022	2.34	8.361
N. Reptilia	18+((19+20)+(21+22))	320	0.51331	55.439	49.182	32.134	3.634	2.594	1.786	0.082	2.886	1.05	89.678	92.087	-2.583	8.389	10.972
O. Eureptilia	(19+20)+(21+22)	317	0.610496	44.863	39.372	27.222	3.655	2.549	1.725	0.064	2.927	1.089	93.528	95.251	-0.846	8.997	9.843
P. Captorhinidae	19+20	299	0	43.771	35.257	24.774	3.944	2.882	2.052	0.132	3.22	1.236	92.623	95.561	4.001	14.747	10.746
Q. Romeriida	21+22	314	0.803922	36.463	32.139	23.448	3.625	2.446	1.608	0.034	2.915	1.103	97.537	98.359	0.035	8.59	8.555
Tree B: Diadectomorpha as sistergoup to Amniota and Varanopidae as Diapsida
complete tree	(1+2+3)+(4+(5+((6+7)+((8+(9+(10+11+12+(13+14))))+((15+17)+(18+((19+20)+(21+(22+16)))))))))	353	0.454542	47.649	37.224	23.621	3.637	2.71	1.955	0.334	2.979	1.179	84.713	95.627	-9.857	11.142	20.999
A. Temnospondyli	1+2+3	314	0.101476	36.099	27.446	18.168	4.163	3.161	2.347	0.426	3.158	1.012	85.822	94.399	3.015	16.906	13.89
B. Lepospondyli	6+7	323	0.654738	21.655	19.744	14.556	2.522	2.246	1.806	0.49	3.192	2.015	68.207	87.873	-24.241	0.238	24.479
C. Reptiliomorpha	4+(5+((6+7)+((8+(9+(10+11+12+(13+14))))+((15+17)+(18+((19+20)+(21+(22+16))))))))	350	0.454542	48.652	38.084	24.091	3.598	2.676	1.926	0.327	2.965	1.192	84.63	95.719	-10.823	10.709	21.532
D. Batrachosauria	5+((6+7)+((8+(9+(10+11+12+(13+14))))+((15+17)+(18+((19+20)+(21+(22+16)))))))	347	0.604388	48.702	37.049	23.424	3.486	2.641	1.928	0.333	2.974	1.255	82.663	94.213	-11.966	10.066	22.032
E. (derived Reptiliomorpha)	(6+7)+((8+(9+(10+11+12+(13+14))))+((15+17)+(18+((19+20)+(21+(22+16))))))	344	0.654738	47.741	37.831	24.095	3.354	2.581	1.902	0.319	2.978	1.328	81.039	92.397	-12.924	8.465	21.389
F. Cotylosauria	(8+(9+(10+11+12+(13+14))))+((15+17)+(18+((19+20)+(21+(22+16)))))	326	0.320729	83.299	75.705	44.533	3.236	2.488	1.823	0.084	2.812	1.195	81.833	84.804	-9.219	5.429	14.648
G. Diadectomorpha	8+(9+(10+11+12+(13+14)))	320	0.320729	116.628	111.207	61.461	3.143	2.554	1.961	0.056	2.888	1.324	78.153	79.404	-15.481	3.811	19.292
H. Diadectidae	9+(10+11+12+(13+14))	317	0.0190091	120.171	114.349	59.978	3.247	2.447	1.783	0.01	2.758	1.148	85.701	85.347	-11.783	7.868	19.651
I. (derived Diadectidae)	10+11+12+(13+14)	314	0.0141214	122.971	119.176	59.675	3.354	2.335	1.59	-0.053	2.634	0.976	93.745	90.988	-9.916	10.174	20.089
J. (derived Diadectidae)	13+14	299	0.0269608	116.33	111.494	60.6	3.473	2.427	1.665	-0.003	2.574	0.917	93.482	93.391	7.88	24.199	16.32
K. Amniota	(15+17)+(18+((19+20)+(21+(22+16))))	323	0.503216	76.865	69.693	41.767	3.265	2.439	1.741	0.06	2.747	1.109	83.798	86.305	-5.503	5.758	11.261
L. Pelycosauria	15+17	320	0.503216	94.872	87.744	49.579	2.933	2.238	1.614	0.017	2.555	1.094	80.307	82.46	-4.538	3.713	8.251
N. Reptilia	18+((19+20)+(21+(22+16)))	320	0.468518	57.465	50.959	33.002	3.625	2.593	1.787	0.08	2.875	1.039	89.255	91.652	-2.752	8.133	10.885
O. Eureptilia	(19+20)+(21+(22+16))	317	0.554603	47.304	41.367	28.427	3.705	2.57	1.725	0.062	2.901	1.007	94.116	95.816	-1.396	8.403	9.798
P. Captorhinidae	19+20	299	0	44.314	35.665	25.025	3.955	2.887	2.052	0.131	3.214	1.216	92.76	95.693	3.873	14.609	10.736
Q. Romeriida	21+(22+16)	314	0.71979	39.39	34.471	25.044	3.741	2.492	1.606	0.031	2.872	0.938	99.217	100.001	-0.969	7.577	8.546
T. Diapsida	22+16	311	0	45.299	40.061	28.761	3.867	2.52	1.575	0.032	2.754	0.68	102.407	103.767	-4.124	6.318	10.442
III. Results for the Akaike Information Criterion	AIC	ΔAIC
Tree A	378.442	146.166
Tree B	232.276	0
IV. Similarity of trackway patterns to the ancestral state reconstrucred for node K (last common ancestor of amniotes)
		Results for tree A		Results for tree B
Taxonomic unit	Specimen	distance to K	rank	distance to K	rank	mean_rank
9. Ichniotherium sphaerodactylum (Thuringian Forest) TM	FG-525	0.924531	2	0.91785	1	1.5
9. Ichniotherium sphaerodactylum (Thuringian Forest) TM	MNG-2356-15	0.883124	1	0.985613	2	1.5
9. Ichniotherium sphaerodactylum (Thuringian Forest) TM	HLMD-WT-297	1.01572	3	1.14991	5	4
9. Ichniotherium sphaerodactylum (Thuringian Forest) TM	MNG-1840-F1	1.1357	4	1.12514	4	4
9. Ichniotherium sphaerodactylum (Thuringian Forest) TM	MB.ICV.1	1.14536	6	1.00316	3	4.5
9. Ichniotherium sphaerodactylum (Thuringian Forest) TM	HF-51	1.13746	5	1.25915	6	5.5
9. Ichniotherium sphaerodactylum (Thuringian Forest) TM	HF-55	1.39938	9	1.43396	8	8.5
9. Ichniotherium sphaerodactylum (Thuringian Forest) TM	MNG-1351	1.40257	10	1.33978	7	8.5
13. Ichniotherium cottae (Thuringian Forest, GB type) TM	NHMS P-418	1.28119	7	1.45736	11	9
9. Ichniotherium sphaerodactylum (Thuringian Forest) TM	BUW-2-F2	1.55035	12	1.44042	9	10.5
9. Ichniotherium sphaerodactylum (Thuringian Forest) TM	MNG-1515-F3	1.37855	8	1.55303	13	10.5
9. Ichniotherium sphaerodactylum (Thuringian Forest) TM	MNG-1515-F1	1.5217	11	1.54096	12	11.5
9. Ichniotherium sphaerodactylum (Thuringian Forest) TM	MSEO-nn-2	1.60921	15	1.45653	10	12.5
11. Ichniotherium cottae TM (Pittsburgh Fm)	CMC VP-3052	1.59471	14	1.59594	16	15
9. Ichniotherium sphaerodactylum (Thuringian Forest) TM	BGR-P-12539-F2	1.58487	13	1.61064	18	15.5
21. Notalacerta missouriensis (McAlester Fm) TM	NMMNH P-31759	1.6631	16	1.58867	15	15.5
9. Ichniotherium sphaerodactylum (Thuringian Forest) TM	MB.ICV.2	1.72912	18	1.5811	14	16
9. Ichniotherium sphaerodactylum (Thuringian Forest) TM	BUW-1	1.67329	17	1.60833	17	17
9. Ichniotherium sphaerodactylum (Thuringian Forest) TM	HF-56	1.74491	19	1.71578	19	19
20. Hyloidichnus bifurcatus (Rabejac Fm/ Hermit Fm) TM	USNM 11518	1.75787	20	1.71649	20	20
4. Hylopus isp. (Mauch Chunk Fm) TM	NMMNH P-64276	1.78537	21	1.93397	24	22.5
9. Ichniotherium sphaerodactylum (Thuringian Forest) TM	BGR-P-12539-F1	1.88699	24	1.78149	21	22.5
9. Ichniotherium sphaerodactylum (Thuringian Forest) TM	MSEO-IIIA-519-F2	1.87184	23	1.79168	22	22.5
1. Batrachichnus isp. (McAlester Fm) TM	NMMNH P-31675	1.91552	25	1.85435	23	24
14. Ichniotherium cottae (Thuringian Forest, Brom type) TM	MNG 1819	1.81182	22	1.97523	27	24.5
9. Ichniotherium sphaerodactylum (Thuringian Forest) TM	NHMW-1963-565	1.97665	26	1.94397	25	25.5
9. Ichniotherium sphaerodactylum (Thuringian Forest) TM	MSEO-IIIA-519-F1	1.97907	27	1.95317	26	26.5
9. Ichniotherium sphaerodactylum (Thuringian Forest) TM	MNG-1515-F2	1.99703	28	2.01057	28	28
17. Dimetropus leisnerianus (Thuringian Forest) TM	NHMW-2003Z0030	2.10792	30	2.11508	29	29.5
5. Amphisauropus kablikae (Thuringian Forest) TM	MNG-JF-60	2.14727	32	2.17699	31	31.5
9. Ichniotherium sphaerodactylum (Thuringian Forest) TM	MNG-1515-F4	2.14097	31	2.18061	32	31.5
13. Ichniotherium cottae (Thuringian Forest, GB type) TM	NHMS AP-244-19	2.06775	29	2.20114	34	31.5
21. Notalacerta missouriensis (McAlester Fm) TM	NMMNH P-31746	2.15027	33	2.15437	30	31.5
13. Ichniotherium cottae (Thuringian Forest, GB type) TM	MNG 1386-F1	2.15311	34	2.18604	33	33.5
14. Ichniotherium cottae (Thuringian Forest, Brom type) TM	MSEO-I-36	2.24564	36	2.28055	35	35.5
9. Ichniotherium sphaerodactylum (Thuringian Forest) TM	MB.ICV.4	2.28578	37	2.33019	36	36.5
22. Dromopus lacertoides (Thuringian Forest) TM	MNG-VF-2010	2.24227	35	2.386	38	36.5
22. Dromopus lacertoides (Thuringian Forest) TM	MNG-13442-F1a	2.28745	38	2.35138	37	37.5
14. Ichniotherium cottae (Thuringian Forest, Brom type) TM	MB.ICV.3-F2	2.34686	39	2.44359	40	39.5
22. Dromopus lacertoides (Thuringian Forest) TM	MNG-2005-F1	2.40625	41	2.38701	39	40
5. Amphisauropus kablikae (Thuringian Forest) TM	MNG-VF-4382/83	2.41709	42	2.45612	42	42
22. Dromopus lacertoides (Thuringian Forest) TM	MNG-2005-F2	2.38558	40	2.51747	46	43
5. Amphisauropus kablikae (Thuringian Forest) TM	MNG-13449	2.43926	43	2.50891	45	44
22. Dromopus lacertoides (Thuringian Forest) TM	MNG-JF-31	2.46866	46	2.47287	43	44.5
9. Ichniotherium sphaerodactylum (Thuringian Forest) TM	MNG-1840-F2	2.48701	48	2.50138	44	46
17. Dimetropus leisnerianus (Thuringian Forest) TM	MNG-13490	2.46422	45	2.54958	47	46
13. Ichniotherium cottae (Thuringian Forest, GB type) TM	MNG 2049	2.63256	52	2.44459	41	46.5
14. Ichniotherium cottae (Thuringian Forest, Brom type) TM	UGKU 130-F2	2.46392	44	2.59734	49	46.5
22. Dromopus lacertoides (Thuringian Forest) TM	MNG-VF-2051-F1	2.478	47	2.64396	51	49
19. Varanopus microdactylus (Thuringian Forest) TM	PMJ-P-1322 (= JP-1)	2.57247	51	2.5687	48	49.5
5. Amphisauropus kablikae (Thuringian Forest) TM	MNG-7813-76	2.52964	49	2.64438	52	50.5
9. Ichniotherium sphaerodactylum (Thuringian Forest) TM	NHMM-2	2.65767	53	2.60666	50	51.5
11. Ichniotherium cottae TM (Pittsburgh Fm)	OSU 16553	2.57029	50	2.71937	53	51.5
9. Ichniotherium sphaerodactylum (Thuringian Forest) TM	NHMS-1312	2.7243	54	2.79699	56	55
9. Ichniotherium sphaerodactylum (Thuringian Forest) TM	UJG-8491	2.80188	57	2.76272	54	55.5
9. Ichniotherium sphaerodactylum (Thuringian Forest) TM	PMJ-P-1321-F2 (= JP-2-F2)	2.78447	56	2.79359	55	55.5
12. Ichniotherium cottae TM (Maroon Fm)	DMNS 50618	2.75733	55	2.82181	57	56
12. Ichniotherium cottae TM (Maroon Fm)	DMNS 50622	2.80933	58	2.87068	60	59
20. Hyloidichnus bifurcatus (Rabejac Fm/ Hermit Fm) TM	ML-Lodeve ohne Nr.	2.84368	59	2.86448	59	59
9. Ichniotherium sphaerodactylum (Thuringian Forest) TM	BUW-2-F1	2.89732	63	2.83475	58	60.5
9. Ichniotherium sphaerodactylum (Thuringian Forest) TM	NHMM-412	2.87449	61	2.89005	61	61
22. Dromopus lacertoides (Thuringian Forest) TM	MNG-JF-1	2.86117	60	3.01256	64	62
9. Ichniotherium sphaerodactylum (Thuringian Forest) TM	MNG-10072	2.93847	65	2.95706	62	63.5
14. Ichniotherium cottae (Thuringian Forest, Brom type) TM	MNG-2356-16-F1	2.88246	62	3.05916	67	64.5
5. Amphisauropus kablikae (Thuringian Forest) TM	NHMS-AF-2-F2	3.01505	67	2.98831	63	65
14. Ichniotherium cottae (Thuringian Forest, Brom type) TM	MB.ICV.3-F1	2.91284	64	3.05817	66	65
20. Hyloidichnus bifurcatus (Rabejac Fm/ Hermit Fm) TM	ML-54 L	2.98055	66	3.04648	65	65.5
10. Ichniotherium cottae (Salop Fm) TM	BU 2471	3.05511	68	3.10872	68	68
15. Dimetropus isp. (Bochum Fm) TM	DBM 060003260001-5	3.15245	70	3.13137	69	69.5
22. Dromopus lacertoides (Thuringian Forest) TM	MNG-VF-4489	3.08814	69	3.24082	70	69.5
1. Batrachichnus isp. (McAlester Fm) TM	NMMNH P-31676/77-F1	3.29066	71	3.39014	73	72
21. Notalacerta missouriensis (McAlester Fm) TM	NMMNH P-31705	3.31055	73	3.35731	71	72
22. Dromopus lacertoides (Thuringian Forest) TM	MNG-13436	3.29884	72	3.36966	72	72
1. Batrachichnus isp. (McAlester Fm) TM	NMMNH P-31757	3.37584	75	3.39135	74	74.5
5. Amphisauropus kablikae (Thuringian Forest) TM	MNG-1902	3.34091	74	3.40938	75	74.5
5. Amphisauropus kablikae (Thuringian Forest) TM	MNG-JF-17	3.42234	76	3.44277	76	76
5. Amphisauropus kablikae (Thuringian Forest) TM	HF-86/87	3.46586	77	3.54449	78	77.5
9. Ichniotherium sphaerodactylum (Thuringian Forest) TM	SMMGD-1354	3.58025	81	3.52617	77	79
5. Amphisauropus kablikae (Thuringian Forest) TM	MNG-13455	3.56967	80	3.56954	79	79.5
3. Limnopus vagus (Pittsburgh Fm/Howard Fm) TM	CMC VP-791	3.52633	79	3.61383	82	80.5
22. Dromopus lacertoides (Thuringian Forest) TM	MB.ICV.22	3.49637	78	3.63622	83	80.5
17. Dimetropus leisnerianus (Thuringian Forest) TM	MNG-1823-F4	3.66446	83	3.58456	81	82
8. Ichniotherium praesidentis (Bochum Fm) TM	DBM 060003309001-4	3.70364	86	3.58053	80	83
5. Amphisauropus kablikae (Thuringian Forest) TM	MNG-VF-21	3.63639	82	3.68166	85	83.5
12. Ichniotherium cottae TM (Maroon Fm)	DMNS 55056	3.66817	84	3.63932	84	84
14. Ichniotherium cottae (Thuringian Forest, Brom type) TM	MNG-1352	3.67059	85	3.78704	88	86.5
3. Limnopus vagus (Pittsburgh Fm/Howard Fm) TM	YPM 207	3.71497	88	3.75551	87	87.5
19. Varanopus microdactylus (Thuringian Forest) TM	MNG-1841	3.72043	89	3.70883	86	87.5
14. Ichniotherium cottae (Thuringian Forest, Brom type) TM	MNG 2356-16-F2	3.70759	87	3.83562	89	88
19. Varanopus microdactylus (Thuringian Forest) TM	MNG-2052	3.87229	91	3.93185	90	90.5
22. Dromopus lacertoides (Thuringian Forest) TM	MNG-VF-1	3.86459	90	3.97573	91	90.5
17. Dimetropus leisnerianus (Thuringian Forest) TM	MNG-1823-F3	4.03602	92	4.08248	93	92.5
17. Dimetropus leisnerianus (Thuringian Forest) TM	MNG-1828-F2	4.05711	93	4.01201	92	92.5
5. Amphisauropus kablikae (Thuringian Forest) TM	MNG-7813-56	4.06767	94	4.11131	94	94
13. Ichniotherium cottae (Thuringian Forest, GB type) TM	MNG-2047	4.10085	95	4.12363	95	95
5. Amphisauropus kablikae (Thuringian Forest) TM	MNG-VF-5163/5166	4.16395	96	4.18374	97	96.5
17. Dimetropus leisnerianus (Thuringian Forest) TM	MNG-1762	4.22615	97	4.14802	96	96.5
1. Batrachichnus isp. (McAlester Fm) TM	NMMNH P-31676/77-F2	4.23483	98	4.28677	98	98
5. Amphisauropus kablikae (Thuringian Forest) TM	NHMS-AF-2-F1	4.32703	99	4.41293	100	99.5
22. Dromopus lacertoides (Thuringian Forest) TM	FG-250-8-17/31/33	4.34309	100	4.34889	99	99.5
14. Ichniotherium cottae (Thuringian Forest, Brom type) TM	SSB-1	4.35959	101	4.46825	102	101.5
17. Dimetropus leisnerianus (Thuringian Forest) TM	MNG-1823-F1	4.4475	102	4.44423	101	101.5
22. Dromopus lacertoides (Thuringian Forest) TM	NHMS-AP-28-7 (= AF-9b)	4.47001	103	4.49379	103	103
2. Batrachichnus salamandroides (Thuringian Forest) TM	MNG-JF-52-1-F2	4.52336	104	4.6096	105	104.5
9. Ichniotherium sphaerodactylum (Thuringian Forest) TM	NHMS-I-Ba-18	4.57476	105	4.55546	104	104.5
14. Ichniotherium cottae (Thuringian Forest, Brom type) TM	UGKU 130-F1	4.64006	106	4.66165	106	106
19. Varanopus microdactylus (Thuringian Forest) TM	MNG-10083	4.74844	107	4.73999	109	108
6. Matthewichnus caudifer (Pottsville Fm) TM	ALMNH 20178 (UCM-060)	4.83385	110	4.66217	107	108.5
5. Amphisauropus kablikae (Thuringian Forest) TM	MNG-1901	4.76117	108	4.76642	110	109
6. Matthewichnus caudifer (Pottsville Fm) TM	MSCB-UCM-1878	4.86514	111	4.71735	108	109.5
3. Limnopus vagus (Pittsburgh Fm/Howard Fm) TM	YPM 405	4.80087	109	4.83767	111	110
5. Amphisauropus kablikae (Thuringian Forest) TM	MNG-JF-4	4.87063	112	4.85714	112	112
14. Ichniotherium cottae (Thuringian Forest, Brom type) TM	PMJ P-1321-F3	4.99712	114	5.05481	114	114
5. Amphisauropus kablikae (Thuringian Forest) TM	MNG-JF-53	4.99217	113	5.07454	116	114.5
6. Matthewichnus caudifer (Pottsville Fm) TM	ALMNH-UCM-469	5.11672	116	4.9972	113	114.5
14. Ichniotherium cottae (Thuringian Forest, Brom type) TM	MNG-10179	5.0255	115	5.05786	115	115
17. Dimetropus leisnerianus (Thuringian Forest) TM	MNG-1823-F2	5.14364	117	5.12478	117	117
5. Amphisauropus kablikae (Thuringian Forest) TM	MNG-JF-52-5	5.22858	118	5.21915	118	118
2. Batrachichnus salamandroides (Thuringian Forest) TM	MNG-JF-52-3-F3	5.62048	119	5.6572	119	119
19. Varanopus microdactylus (Thuringian Forest) TM	SFM-7	5.66996	120	5.75802	120	120
5. Amphisauropus kablikae (Thuringian Forest) TM	MNG-JF-52-3-F1	5.85225	121	5.87677	121	121
5. Amphisauropus kablikae (Thuringian Forest) TM	MNG-VF-6037/-6057-F1b	5.88405	122	5.92677	122	122
5. Amphisauropus kablikae (Thuringian Forest) TM	MNG-13475-F2	5.93512	123	6.01471	123	123
5. Amphisauropus kablikae (Thuringian Forest) TM	MNG-JF-90-F1	6.35385	124	6.40271	124	124
2. Batrachichnus salamandroides (Thuringian Forest) TM	MNG-VF-4307/-4314	6.4852	125	6.50831	125	125
5. Amphisauropus kablikae (Thuringian Forest) TM	MNG-VF-2	6.52561	126	6.56386	126	126
2. Batrachichnus salamandroides (Thuringian Forest) TM	MNG-JF-52-1-F1	6.71926	127	6.80334	127	127
5. Amphisauropus kablikae (Thuringian Forest) TM	MNG-JF-52-2	6.90731	128	6.96391	128	128
5. Amphisauropus kablikae (Thuringian Forest) TM	MNG-VF-6037/-6057-F3	7.02863	129	7.06794	129	129
5. Amphisauropus kablikae (Thuringian Forest) TM	MNG-JF-55	7.17421	130	7.20297	130	130
2. Batrachichnus salamandroides (Thuringian Forest) TM	MNG-JF-90-F2	7.48187	131	7.49437	131	131
5. Amphisauropus kablikae (Thuringian Forest) TM	MNG-VF-6058/-6074-F1	7.59773	133	7.63957	132	132.5
16. Tambachichnium schmidti (Thuringian Forest) TM	PMJ-P-1321-F1	7.58042	132	7.78612	134	133
5. Amphisauropus kablikae (Thuringian Forest) TM	MNG-7813-84	7.73888	134	7.77072	133	133.5
5. Amphisauropus kablikae (Thuringian Forest) TM	MNG-VF-5222	7.84087	135	7.86246	135	135
5. Amphisauropus kablikae (Thuringian Forest) TM	MNG-13446	8.07689	136	8.07818	136	136
5. Amphisauropus kablikae (Thuringian Forest) TM	FG-250/9/4	8.17439	137	8.20077	137	137
2. Batrachichnus salamandroides (Thuringian Forest) TM	MNG-JF-52-4	8.27299	138	8.31034	138	138
5. Amphisauropus kablikae (Thuringian Forest) TM	MNG-13450	8.42253	139	8.44636	139	139
18. Erpetopus willistoni (Choza Fm) TM	NMMNH P-32478	8.65229	140	8.73143	140	140
5. Amphisauropus kablikae (Thuringian Forest) TM	MNG-VF-5084	8.69044	141	8.7447	141	141
5. Amphisauropus kablikae (Thuringian Forest) TM	MNG-VF-6037/-6057-F1a	8.96512	142	9.00929	142	142
2. Batrachichnus salamandroides (Thuringian Forest) TM	MNG-JF-52-1-F3	9.55629	143	9.55414	143	143
5. Amphisauropus kablikae (Thuringian Forest) TM	MNG-JF-52-3-F2	9.63085	144	9.62213	144	144
7. Matthewichnus caudifer (Robledo Mts. Fm) TM	NMMNH P-23312	10.2639	146	10.1186	145	145.5
16. Tambachichnium schmidti (Thuringian Forest) TM	MNG-1828-F1	10.1431	145	10.352	146	145.5
18. Erpetopus willistoni (Choza Fm) TM	NMMNH P-32487	10.3435	147	10.4846	147	147
18. Erpetopus willistoni (Choza Fm) TM	NMMNH P-32411	11.4031	148	11.4785	148	148
18. Erpetopus willistoni (Choza Fm) TM	NMMNH P-40196	11.6193	149	11.7084	149	149
2. Batrachichnus salamandroides (Thuringian Forest) TM	MNG-JF-32	12.6409	150	12.7062	150	150
7. Matthewichnus caudifer (Robledo Mts. Fm) TM	NMMNH P-23511	14.1705	151	14.0178	151	151
18. Erpetopus willistoni (Choza Fm) TM	NMMNH P-32400	17.6806	152	17.7366	152	152

## Sheet: ASR_results_with_ranges
ASR results with ranges
Tree A: Diadectomorpha as sistergoup to Amniota and Varanopidae as Pelycosauria
Node	Ma	Dragmarks	max.pL		pL		pIV		Sp/pL		Pp/pL		Gp/pL		(Gp-Gm)/pL		GAD/pL		Dpm/pL		Pap		Pam		Oap		Oam		Oam-Oap
Root	353	0.446258	47.588	(23.187-97.670)	37.171	(16.698-82.747)	23.63	(11.589-48.184)	3.649	(2.654-4.643)	2.714	(2.150-3.277)	1.955	(1.498-2.412)	0.333	(0.102-0.565)	2.978	(2.409-3.548)	1.169	(0.591-1.748)	84.961	(67.773-102.149)	95.857	(79.392-112.322)	-9.886	(-22.114-2.343)	11.166	(-3.457-25.790)	21.052	(9.336-32.768)
A	314	0.100059	36.413	(24.198-54.794)	27.719	(17.590-43.683)	18.342	(12.234-27.498)	4.166	(3.601-4.731)	3.163	(2.842-3.483)	2.348	(2.088-2.607)	0.424	(0.292-0.555)	3.159	(2.835-3.483)	1.011	(0.682-1.340)	85.902	(76.133-95.671)	94.403	(85.045-103.760)	3.031	(-3.919-9.981)	17.055	(8.743-25.366)	14.024	(7.365-20.683)
B	323	0.639262	21.641	(13.956-33.556)	19.73	(12.108-32.148)	14.552	(9.422-22.474)	2.525	(1.918-3.132)	2.247	(1.903-2.591)	1.805	(1.527-2.084)	0.49	(0.349-0.632)	3.192	(2.844-3.539)	2.012	(1.659-2.366)	68.263	(57.777-78.749)	87.928	(77.883-97.973)	-24.248	(-31.709--16.788)	0.239	(-8.683-9.160)	24.487	(17.339-31.635)
C	350	0.446258	48.553	(25.461-92.587)	37.998	(18.525-77.942)	24.084	(12.704-45.658)	3.61	(2.717-4.503)	2.68	(2.174-3.186)	1.925	(1.515-2.336)	0.327	(0.119-0.535)	2.965	(2.453-3.476)	1.181	(0.662-1.701)	84.89	(69.460-100.321)	95.966	(81.185-110.748)	-10.854	(-21.833-0.124)	10.725	(-2.403-23.853)	21.579	(11.061-32.097)
D	347	0.592674	48.554	(25.884-91.080)	36.924	(18.333-74.365)	23.4	(12.546-43.645)	3.5	(2.630-4.370)	2.646	(2.152-3.139)	1.927	(1.527-2.327)	0.333	(0.130-0.535)	2.974	(2.475-3.472)	1.243	(0.736-1.749)	82.969	(67.931-98.006)	94.509	(80.104-108.914)	-12.005	(-22.704--1.306)	10.074	(-2.720-22.867)	22.078	(11.828-32.329)
E	344	0.639262	47.541	(25.542-88.488)	37.652	(18.858-75.178)	24.052	(12.995-44.516)	3.371	(2.512-4.231)	2.586	(2.099-3.073)	1.902	(1.507-2.297)	0.319	(0.119-0.519)	2.977	(2.485-3.469)	1.313	(0.813-1.813)	81.406	(66.555-96.258)	92.757	(78.531-106.984)	-12.972	(-23.539--2.406)	8.466	(-4.170-21.101)	21.438	(11.314-31.562)
F	326	0.295374	82.084	(52.930-127.298)	74.461	(45.691-121.345)	44.175	(28.599-68.236)	3.285	(2.678-3.892)	2.504	(2.160-2.848)	1.821	(1.542-2.100)	0.085	(-0.057-0.226)	2.81	(2.462-3.158)	1.153	(0.800-1.506)	82.862	(72.373-93.351)	85.835	(75.787-95.883)	-9.361	(-16.824--1.899)	5.386	(-3.538-14.310)	14.748	(7.598-21.898)
G	320	0.295374	116.066	(80.274-167.816)	110.604	(73.374-166.722)	61.302	(42.540-88.339)	3.16	(2.650-3.670)	2.56	(2.271-2.849)	1.96	(1.726-2.195)	0.056	(-0.063-0.175)	2.888	(2.595-3.180)	1.309	(1.013-1.606)	78.525	(69.711-87.339)	79.777	(71.334-88.220)	-15.539	(-21.810--9.268)	3.799	(-3.700-11.298)	19.338	(13.330-25.346)
H	317	0.0190528	119.866	(81.704-175.852)	114.023	(74.427-174.685)	59.902	(40.973-87.576)	3.258	(2.728-3.788)	2.45	(2.149-2.750)	1.781	(1.537-2.025)	0.011	(-0.113-0.134)	2.758	(2.454-3.061)	1.139	(0.831-1.448)	85.948	(76.786-95.110)	85.594	(76.817-94.370)	-11.831	(-18.350--5.313)	7.865	(0.070-15.660)	19.696	(13.450-25.941)
I	314	0.0190528	122.908	(89.595-168.606)	119.109	(83.779-169.337)	59.671	(43.623-81.622)	3.36	(2.922-3.797)	2.336	(2.088-2.584)	1.588	(1.387-1.789)	-0.053	(-0.155-0.049)	2.633	(2.383-2.884)	0.971	(0.717-1.226)	93.892	(86.335-101.449)	91.136	(83.897-98.375)	-9.958	(-15.335--4.581)	10.179	(3.750-16.609)	20.137	(14.986-25.289)
J	299	0.0269608	116.316	(77.540-174.482)	111.481	(70.989-175.071)	60.607	(40.552-90.581)	3.474	(2.913-4.035)	2.427	(2.109-2.745)	1.664	(1.406-1.922)	-0.003	(-0.133-0.128)	2.574	(2.253-2.895)	0.916	(0.590-1.242)	93.52	(83.826-103.213)	93.429	(84.143-102.715)	7.899	(1.002-14.796)	24.222	(15.975-32.470)	16.324	(9.716-22.931)
K	323	0.446906	75.247	(50.428-112.281)	68.04	(43.582-106.224)	41.278	(27.764-61.371)	3.334	(2.781-3.888)	2.463	(2.149-2.776)	1.738	(1.484-1.993)	0.062	(-0.067-0.191)	2.745	(2.427-3.062)	1.049	(0.727-1.372)	85.261	(75.693-94.828)	87.771	(78.606-96.936)	-5.702	(-12.509-1.105)	5.694	(-2.446-13.834)	11.396	(4.874-17.918)
L	320	0.446906	93.625	(63.635-137.748)	86.013	(55.965-132.192)	49.547	(33.794-72.642)	3.084	(2.549-3.618)	2.29	(1.987-2.593)	1.609	(1.363-1.854)	0.02	(-0.105-0.144)	2.538	(2.232-2.844)	0.945	(0.635-1.256)	83.242	(74.011-92.472)	85.391	(76.549-94.233)	-5.163	(-11.730-1.404)	3.306	(-4.547-11.159)	8.469	(2.177-14.761)
M	317	0.3125	93.428	(57.445-151.951)	83.264	(48.457-143.071)	48.249	(29.797-78.126)	3.347	(2.675-4.020)	2.38	(1.999-2.762)	1.61	(1.301-1.920)	-0.014	(-0.171-0.142)	2.585	(2.199-2.970)	0.798	(0.407-1.190)	87.791	(76.164-99.418)	88.897	(77.760-100.034)	-6.022	(-14.294-2.250)	2.34	(-7.552-12.232)	8.361	(0.436-16.287)
N	320	0.51331	55.439	(35.738-85.999)	49.182	(30.170-80.174)	32.134	(20.798-49.649)	3.634	(3.027-4.241)	2.594	(2.250-2.939)	1.786	(1.507-2.065)	0.082	(-0.059-0.224)	2.886	(2.538-3.234)	1.05	(0.697-1.403)	89.678	(79.182-100.174)	92.087	(82.033-102.142)	-2.583	(-10.050-4.884)	8.389	(-0.541-17.318)	10.972	(3.817-18.126)
O	317	0.610496	44.863	(29.237-68.842)	39.372	(24.446-63.411)	27.222	(17.809-41.610)	3.655	(3.063-4.247)	2.549	(2.214-2.885)	1.725	(1.453-1.998)	0.064	(-0.074-0.202)	2.927	(2.587-3.266)	1.089	(0.745-1.434)	93.528	(83.292-103.764)	95.251	(85.445-105.056)	-0.846	(-8.129-6.436)	8.997	(0.288-17.706)	9.843	(2.866-16.821)
P	299	0	43.771	(27.235-70.346)	35.257	(20.793-59.784)	24.774	(15.481-39.644)	3.944	(3.287-4.600)	2.882	(2.510-3.254)	2.052	(1.750-2.353)	0.132	(-0.021-0.284)	3.22	(2.844-3.596)	1.236	(0.854-1.618)	92.623	(81.281-103.965)	95.561	(84.697-106.426)	4.001	(-4.068-12.070)	14.747	(5.098-24.397)	10.746	(3.015-18.477)
Q	314	0.803922	36.463	(24.642-53.957)	32.139	(20.778-49.711)	23.448	(15.902-34.574)	3.625	(3.083-4.167)	2.446	(2.139-2.753)	1.608	(1.359-1.857)	0.034	(-0.092-0.161)	2.915	(2.605-3.226)	1.103	(0.787-1.418)	97.537	(88.170-106.905)	98.359	(89.385-107.333)	0.035	(-6.630-6.700)	8.59	(0.620-16.560)	8.555	(2.170-14.941)
Tree B: Diadectomorpha as sistergoup to Amniota and Varanopidae as Diapsida
Node	Ma	Dragmarks	max.pL		pL		pIV		Sp/pL		Pp/pL		Gp/pL		(Gp-Gm)/pL		GAD/pL		Dpm/pL		Pap		Pam		Oap		Oam		Oam-Oap
Root	353	0.454542	47.649	(22.771-99.710)	37.224	(16.487-84.045)	23.621	(11.411-48.896)	3.637	(2.666-4.608)	2.71	(2.149-3.270)	1.955	(1.498-2.412)	0.334	(0.102-0.565)	2.979	(2.403-3.555)	1.179	(0.582-1.776)	84.713	(68.366-101.061)	95.627	(80.057-111.196)	-9.857	(-22.209-2.494)	11.142	(-3.628-25.911)	20.999	(9.281-32.717)
A	314	0.101476	36.099	(23.706-54.971)	27.446	(17.260-43.643)	18.168	(12.005-27.496)	4.163	(3.610-4.716)	3.161	(2.842-3.481)	2.347	(2.087-2.607)	0.426	(0.294-0.558)	3.158	(2.830-3.487)	1.012	(0.672-1.351)	85.822	(76.512-95.133)	94.399	(85.531-103.266)	3.015	(-4.019-10.050)	16.906	(8.494-25.317)	13.89	(7.217-20.564)
B	323	0.654738	21.655	(13.802-33.976)	19.744	(12.014-32.448)	14.556	(9.339-22.687)	2.522	(1.930-3.115)	2.246	(1.904-2.588)	1.806	(1.527-2.084)	0.49	(0.349-0.631)	3.192	(2.840-3.543)	2.015	(1.651-2.379)	68.207	(58.234-78.179)	87.873	(78.375-97.370)	-24.241	(-31.776--16.706)	0.238	(-8.771-9.248)	24.479	(17.331-31.628)
C	350	0.454542	48.652	(25.073-94.406)	38.084	(18.332-79.119)	24.091	(12.537-46.294)	3.598	(2.726-4.469)	2.676	(2.172-3.179)	1.926	(1.516-2.336)	0.327	(0.119-0.535)	2.965	(2.448-3.483)	1.192	(0.656-1.727)	84.63	(69.954-99.307)	95.719	(81.741-109.697)	-10.823	(-21.912-0.266)	10.709	(-2.550-23.969)	21.532	(11.012-32.052)
D	347	0.604388	48.702	(25.525-92.924)	37.049	(18.168-75.552)	23.424	(12.394-44.272)	3.486	(2.636-4.336)	2.641	(2.150-3.131)	1.928	(1.528-2.328)	0.333	(0.130-0.535)	2.974	(2.470-3.479)	1.255	(0.733-1.777)	82.663	(68.360-96.967)	94.213	(80.590-107.836)	-11.966	(-22.774--1.159)	10.066	(-2.857-22.988)	22.032	(11.779-32.285)
E	344	0.654738	47.741	(25.221-90.372)	37.831	(18.715-76.473)	24.095	(12.849-45.185)	3.354	(2.515-4.193)	2.581	(2.096-3.065)	1.902	(1.507-2.297)	0.319	(0.119-0.519)	2.978	(2.480-3.475)	1.328	(0.812-1.843)	81.039	(66.911-95.167)	92.397	(78.942-105.853)	-12.924	(-23.599--2.250)	8.465	(-4.299-21.229)	21.389	(11.262-31.516)
F	326	0.320729	83.299	(52.973-130.986)	75.705	(45.952-124.722)	44.533	(28.509-69.563)	3.236	(2.641-3.832)	2.488	(2.144-2.831)	1.823	(1.543-2.103)	0.084	(-0.058-0.226)	2.812	(2.459-3.165)	1.195	(0.829-1.561)	81.833	(71.811-91.854)	84.804	(75.260-94.349)	-9.219	(-16.791--1.647)	5.429	(-3.625-14.483)	14.648	(7.464-21.831)
G	320	0.320729	116.628	(79.835-170.378)	111.207	(73.212-168.923)	61.461	(42.307-89.288)	3.143	(2.644-3.641)	2.554	(2.267-2.842)	1.961	(1.727-2.196)	0.056	(-0.063-0.175)	2.888	(2.593-3.184)	1.324	(1.018-1.630)	78.153	(69.761-86.544)	79.404	(71.412-87.396)	-15.481	(-21.821--9.141)	3.811	(-3.771-11.392)	19.292	(13.277-25.307)
H	317	0.0190091	120.171	(81.033-178.212)	114.349	(74.042-176.598)	59.978	(40.679-88.433)	3.247	(2.729-3.765)	2.447	(2.147-2.746)	1.783	(1.539-2.026)	0.01	(-0.113-0.134)	2.758	(2.451-3.066)	1.148	(0.830-1.467)	85.701	(76.977-94.426)	85.347	(77.038-93.656)	-11.783	(-18.375--5.192)	7.868	(-0.014-15.750)	19.651	(13.397-25.905)
I	314	0.0141214	122.971	(88.779-170.333)	119.176	(83.201-170.706)	59.675	(43.289-82.264)	3.354	(2.925-3.782)	2.335	(2.088-2.583)	1.59	(1.389-1.792)	-0.053	(-0.155-0.049)	2.634	(2.379-2.888)	0.976	(0.713-1.239)	93.745	(86.532-100.958)	90.988	(84.119-97.858)	-9.916	(-15.366--4.466)	10.174	(3.657-16.690)	20.089	(14.919-25.260)
J	299	0.0269608	116.33	(76.721-176.387)	111.494	(70.448-176.456)	60.6	(40.212-91.326)	3.473	(2.925-4.020)	2.427	(2.111-2.743)	1.665	(1.407-1.922)	-0.003	(-0.133-0.128)	2.574	(2.249-2.899)	0.917	(0.581-1.254)	93.482	(84.266-102.697)	93.391	(84.614-102.168)	7.88	(0.917-14.843)	24.199	(15.873-32.525)	16.32	(9.714-22.925)
K	323	0.503216	76.865	(50.726-116.472)	69.693	(44.067-110.220)	41.767	(27.733-62.904)	3.265	(2.718-3.811)	2.439	(2.124-2.755)	1.741	(1.484-1.998)	0.06	(-0.070-0.191)	2.747	(2.423-3.072)	1.109	(0.773-1.445)	83.798	(74.597-93.000)	86.305	(77.542-95.069)	-5.503	(-12.455-1.449)	5.758	(-2.555-14.071)	11.261	(4.666-17.857)
L	320	0.503216	94.872	(62.890-143.118)	87.744	(55.755-138.087)	49.579	(33.065-74.341)	2.933	(2.392-3.474)	2.238	(1.925-2.550)	1.614	(1.359-1.868)	0.017	(-0.112-0.146)	2.555	(2.235-2.876)	1.094	(0.761-1.426)	80.307	(71.204-89.409)	82.46	(73.791-91.129)	-4.538	(-11.415-2.340)	3.713	(-4.510-11.937)	8.251	(1.726-14.776)
N	317	0.468518	57.465	(36.624-90.166)	50.959	(31.006-83.753)	33.002	(21.172-51.440)	3.625	(3.032-4.217)	2.593	(2.251-2.935)	1.787	(1.508-2.066)	0.08	(-0.061-0.221)	2.875	(2.524-3.227)	1.039	(0.675-1.403)	89.255	(79.282-99.229)	91.652	(82.153-101.151)	-2.752	(-10.288-4.784)	8.133	(-0.878-17.143)	10.885	(3.736-18.034)
O	320	0.554603	47.304	(30.644-73.020)	41.367	(25.627-66.774)	28.427	(18.534-43.603)	3.705	(3.134-4.276)	2.57	(2.241-2.900)	1.725	(1.457-1.994)	0.062	(-0.074-0.198)	2.901	(2.562-3.240)	1.007	(0.656-1.358)	94.116	(84.505-103.728)	95.816	(86.661-104.970)	-1.396	(-8.658-5.867)	8.403	(-0.281-17.086)	9.798	(2.908-16.688)
P	317	0	44.314	(27.232-72.111)	35.665	(20.845-61.021)	25.025	(15.489-40.433)	3.955	(3.315-4.596)	2.887	(2.518-3.257)	2.052	(1.750-2.353)	0.131	(-0.022-0.284)	3.214	(2.834-3.594)	1.216	(0.823-1.610)	92.76	(81.980-103.540)	95.693	(85.426-105.960)	3.873	(-4.272-12.018)	14.609	(4.870-24.348)	10.736	(3.008-18.463)
Q	299	0.71979	39.39	(26.745-58.015)	34.471	(22.490-52.833)	25.044	(17.101-36.676)	3.741	(3.232-4.250)	2.492	(2.198-2.786)	1.606	(1.367-1.846)	0.031	(-0.090-0.153)	2.872	(2.570-3.174)	0.938	(0.625-1.251)	99.217	(90.645-107.788)	100.001	(91.837-108.165)	-0.969	(-7.445-5.508)	7.577	(-0.167-15.322)	8.546	(2.402-14.690)
R	314	0	45.299	(28.341-72.402)	40.061	(23.883-67.197)	28.761	(18.119-45.654)	3.867	(3.250-4.483)	2.52	(2.164-2.876)	1.575	(1.285-1.865)	0.032	(-0.115-0.179)	2.754	(2.388-3.120)	0.68	(0.301-1.059)	102.407	(92.025-112.789)	103.767	(93.879-113.656)	-4.124	(-11.968-3.721)	6.318	(-3.062-15.699)	10.442	(3.000-17.884)

## Sheet: Data_for_all_trackways
TM	Ichnotaxon	Specimen	Sp	Sm	Pp	Pm	Dpm	Gp	Gm	GAD	Pap	Pam	Oap	Oam	pI	pII	pIII	pIV	pV	mI	mII	mIII	mIV	mV	pL	mL	pL	pIV	Sp/pL	Pp/pL	Gp/pL	(Gp-Gm)/pL	GAD/pL	Dpm/pL	Pap	Pap	Oap	Oam	Oam-Oap
1	Batrachichnus isp.	NMMNH P-31675	64	64.4	61.9	56.4	29.5	50.4	46	63	61.3	70.4	-5	7.9	6.1	8.4	11.8	14.3	8.7	5	7.2	8.9	6.8	NA	23.5	16.2	23.5	14.3	2.7234	2.63404	2.14468	0.187234	2.68085	1.25532	61.3	70.4	-5	7.9	12.9
1	Batrachichnus isp.	NMMNH P-31757	75	79	58	59	20.3	45	45	61	79.5	86	3.3	16	4.7	7	10	11.7	8	4	5.7	7	6	NA	18.5	13	18.5	11.7	4.05405	3.13514	2.43243	0	3.2973	1.0973	79.5	86	3.3	16	12.7
1	Batrachichnus isp.	NMMNH P-31676/77-F1	77	74.5	60	53.3	15	45.3	36.7	55.5	102.5	89.5	9	11.8	5.3	9	12.5	14.8	9.3	4.3	7	9	6.8	NA	21.7	15	21.7	14.8	3.54839	2.76498	2.08756	0.396313	2.5576	0.691244	102.5	89.5	9	11.8	2.8
1	Batrachichnus isp.	NMMNH P-31676/77-F2	67.5	67.5	50	46.3	15	36.3	29.7	49	89	94	4	7.3	4.3	6	8.7	11	7	4	5	5.5	4.5	NA	15.5	10.7	15.5	11	4.35484	3.22581	2.34194	0.425806	3.16129	0.967742	89	94	4	7.3	3.3
2	Batrachichnus salamandroides	JF-32	33.8	33.4	25	21.3	2.6	18.5	13.3	19.7	88.3	106.3	-5.4	11.3	1.6	2.1	3	3.6	2	1.3	2	2.3	1	NA	5	3.5	5	3.6	6.76	5	3.7	1.04	3.94	0.52	88.3	106.3	-5.4	11.3	16.7
2	Batrachichnus salamandroides	JF-52-1-F1	60.3	56.7	44	37.3	7	31.3	23.3	38.5	91	104	8.2	12.2	2.4	3.8	5.2	7.3	4	2.2	3	3.6	2.2	NA	12	7.8	12	7.3	5.025	3.66667	2.60833	0.666667	3.20833	0.583333	91	104	8.2	12.2	4
2	Batrachichnus salamandroides	JF-52-1-F2	49	43.7	36	31.3	8.3	26.5	20	32	88	98.5	1	7	2	3.8	5	6.5	4	1.8	3	3.3	2.2	NA	12	7	12	6.5	4.08333	3	2.20833	0.541667	2.66667	0.691667	88	98.5	1	7	6
2	Batrachichnus salamandroides	JF-52-1-F3	45	41	39	32.5	13.7	31.5	26	36	68	81	-24	14	3	4.7	6	7.5	4	2.3	4	4.3	3	NA	9	8.3	9	7.5	5	4.33333	3.5	0.611111	4	1.52222	68	81	-24	14	38
2	Batrachichnus salamandroides	JF-52-3-F3	51	44.3	34	31	10.7	23.5	18.5	40	114	97.7	-0.3	10.6	2	3.7	5	6.3	3.5	1.8	2.8	3.2	2	NA	10.5	6.8	10.5	6.3	4.85714	3.2381	2.2381	0.47619	3.80952	1.01905	114	97.7	-0.3	10.6	10.9
2	Batrachichnus salamandroides	JF-52-4	48.7	51	42.3	33.3	11.2	32.3	21.8	36	43	99.3	-11.6	14.4	2.3	3.5	5	6.5	NA	2.2	3.2	4.2	2.5	NA	11.5	8.2	11.5	6.5	4.23478	3.67826	2.8087	0.913043	3.13043	0.973913	43	99.3	-11.6	14.4	26
2	Batrachichnus salamandroides	JF-90-F2	36.8	37.8	37	27.5	13.8	30.2	19.5	31.7	61.8	98	-1.3	-2.8	3	4.3	5.8	7.3	3.3	2.3	3.5	4	2.8	NA	11.8	8	11.8	7.3	3.11864	3.13559	2.55932	0.90678	2.68644	1.16949	61.8	98	-1.3	-2.8	-1.5
2	Batrachichnus salamandroides	MNG-7901-F2 (= JF-20-F2)	51	56	42	35	13.3	33.5	22	41	76	105	0	13	2.7	4.5	7	NA	NA	2	4	5	2.7	NA	NA	8.3	NA	NA	NA	NA	NA	NA	NA	NA	76	105	0	13	13
2	Batrachichnus salamandroides	VF-4273	71.2	63.3	55	45.1	13.8	42.8	30.4	51.2	83.3	89.7	-6.4	9.5	3	6	8	10	NA	2.9	5	5.9	3.5	NA	NA	11	NA	10	NA	NA	NA	NA	NA	NA	83.3	89.7	-6.4	9.5	15.9
2	Batrachichnus salamandroides	VF-4307/-4314	62.1	62.8	51.3	42.7	18.2	40.4	26.9	52.3	72.5	96.6	2.4	14.7	3.3	6.4	8.6	10.9	5.5	2.8	5.3	6.4	4.3	NA	17	12.3	17	10.9	3.65294	3.01765	2.37647	0.794118	3.07647	1.07059	72.5	96.6	2.4	14.7	12.3
2	Batrachichnus salamandroides	VF-4463	30.4	31.6	18.5	18.8	12.7	10.7	10	28	106.2	114.3	1.5	16.6	NA	NA	NA	NA	NA	1	2	2.8	1.9	NA	NA	5.3	NA	NA	NA	NA	NA	NA	NA	NA	106.2	114.3	1.5	16.6	15.1
3	Limnopus vagus	CMC VP-791	134.3	137	106.6	95	28.8	82	65.4	97.3	81	95	-10.3	-1.8	12.4	17.3	22.3	30.8	20.5	7.3	13.2	17	14.3	NA	45.5	28	45.5	30.8	2.95165	2.34286	1.8022	0.364835	2.13846	0.632967	81	95	-10.3	-1.8	8.5
3	Limnopus vagus	YPM 207	523.5	537.5	403.3	492.7	126.5	305.7	278.3	404.5	87.5	93.5	5.3	42	31.3	48.3	61	72.5	NA	37.3	40.3	47.5	39.3	NA	124	93.3	124	72.5	4.22177	3.25242	2.46532	0.220968	3.2621	1.02016	87.5	93.5	5.3	42	36.7
3	Limnopus vagus	YPM 405	562	586	397	403.5	114	279.7	282.5	393	87.5	88	1.8	18.3	26	37	56	68.3	52	27	32.7	43.3	36	NA	110.3	92.7	110.3	68.3	5.09519	3.59927	2.53581	-0.0253853	3.56301	1.03354	87.5	88	1.8	18.3	16.5
4	Hylopus isp.	NMMNH P-64276	238	236.5	153	143.4	44.8	95.3	82.6	158.7	99.7	108.5	-9.4	12.4	16.4	22	29.2	35.3	20	12.2	20	27.4	33.3	14	57	47.7	57	35.3	4.17544	2.68421	1.67193	0.222807	2.78421	0.785965	99.7	108.5	-9.4	12.4	21.8
5	Amphisauropus kablikae	AF-2-F1	286	274.5	201.7	174.3	49	141	106.7	183	88	100.5	-14	69.8	12.7	18	27	31	NA	9.3	18.3	19	20.8	13.3	66	47	66	31	4.33333	3.05606	2.13636	0.519697	2.77273	0.742424	88	100.5	-14	69.8	83.8
5	Amphisauropus kablikae	AF-2-F2	229	232	156	151	71	107	102.3	190	96	96	0	53.8	11	16.3	23.3	28.3	15	11.5	16.3	20	18.7	13.5	54.5	50	54.5	28.3	4.20183	2.86239	1.9633	0.0862385	3.48624	1.30275	96	96	0	53.8	53.8
5	Amphisauropus kablikae	FG-250/9/4	82.5	78	61.2	53	17.8	44.6	35	57.3	84.3	94	-35.2	33.4	2.7	6	8.2	9.5	NA	2.8	4.6	5.8	6.4	5	15	11	15	9.5	5.5	4.08	2.97333	0.64	3.82	1.18667	84.3	94	-35.2	33.4	68.6
5	Amphisauropus kablikae	HF-86/87	223.5	236	169.4	162	44.8	126.2	110.7	159	81.5	88	-3.2	33.5	9.8	17	22	31.5	20	7.8	13	17.3	18.3	10.7	53	35.3	53	31.5	4.21698	3.19623	2.38113	0.292453	3	0.845283	81.5	88	-3.2	33.5	36.7
5	Amphisauropus kablikae	JF-2	98.2	99.2	67	58.3	7.1	45.5	31.8	57	93.8	115.6	-28.3	76	3.3	6	7.5	11	NA	3.3	4.3	6	6.5	3.7	NA	NA	NA	11	NA	NA	NA	NA	NA	NA	93.8	115.6	-28.3	76	104.3
5	Amphisauropus kablikae	JF-4	53.9	49.9	45.1	38.8	18	34.3	30.4	42.1	75.4	76.3	-24.7	15.8	2.9	4.8	6.7	7.8	3.5	2.8	4	5	5.7	3	12.8	11	12.8	7.8	4.21094	3.52344	2.67969	0.304687	3.28906	1.40625	75.4	76.3	-24.7	15.8	40.5
5	Amphisauropus kablikae	JF-17	53.5	55	44.3	43	20.3	37.3	32	45	69	75	-1.25	44.7	4.5	8	11	12	6	3	4.3	4.7	6	4	23	12.5	23	12	2.32609	1.92609	1.62174	0.230435	1.95652	0.882609	69	75	-1.25	44.7	45.95
5	Amphisauropus kablikae	JF-52-2	65	61	47.5	44	11	36	26	49	93	113	-3.3	41.7	3	4.7	6.7	8.5	6	2.7	4	5.3	5	3	14	10.5	14	8.5	4.64286	3.39286	2.57143	0.714286	3.5	0.785714	93	113	-3.3	41.7	45
5	Amphisauropus kablikae	JF-52-3-F1	59.7	60.7	48	40.1	16.8	37.7	27	47.8	76.5	99.8	-15.3	27.3	3	5	6.7	8.5	NA	2.8	4	5.2	6.3	4	15.5	11.5	15.5	8.5	3.85161	3.09677	2.43226	0.690323	3.08387	1.08387	76.5	99.8	-15.3	27.3	42.6
5	Amphisauropus kablikae	JF-52-3-F2	79.5	78.6	68.8	54.5	29.8	56.4	37.3	68.8	139.5	91.8	-39.3	31.1	3.2	6.2	8.8	12	7	3.2	4.2	5.4	6.6	3.4	19	13	19	12	4.18421	3.62105	2.96842	1.00526	3.62105	1.56842	139.5	91.8	-39.3	31.1	70.4
5	Amphisauropus kablikae	JF-52-5	73	74.7	62.5	54.3	28	52.5	39.5	66	75	86.7	-28	32	4.5	6	9.5	11.5	5	3.7	5.3	7.3	8	4.3	21.5	17	21.5	11.5	3.39535	2.90698	2.44186	0.604651	3.06977	1.30233	75	86.7	-28	32	60
5	Amphisauropus kablikae	JF-53	79.7	75.7	61.3	52	13.4	46.5	35	50.3	82.7	95	-29.7	16.4	4	6.5	9	11	NA	3.5	5.7	7	7.3	3.5	20	13.7	20	11	3.985	3.065	2.325	0.575	2.515	0.67	82.7	95	-29.7	16.4	46.1
5	Amphisauropus kablikae	JF-55	59	70	51.5	46	16	43	29.7	74	69	104	-8	39.3	4	7	9	11.5	5	3	5.5	6.5	6.8	3.3	18.5	14	18.5	11.5	3.18919	2.78378	2.32432	0.718919	4	0.864865	69	104	-8	39.3	47.3
5	Amphisauropus kablikae	JF-60	69.3	68.3	51	44	21.4	37.3	30.7	54.5	82.3	98	-18.7	34.8	4.3	6.5	8.8	11.5	6	3.3	5	6	5.8	3.3	20.5	12.5	20.5	11.5	3.38049	2.4878	1.81951	0.321951	2.65854	1.0439	82.3	98	-18.7	34.8	53.5
5	Amphisauropus kablikae	JF-90-F1	74.5	75	63.8	54.3	16	50.4	39	55	73.8	89	-24.8	14.2	4.8	7.5	9.3	NA	NA	3.7	5.3	6.7	NA	NA	18	15	18	NA	4.13889	3.54444	2.8	0.633333	3.05556	0.888889	73.8	89	-24.8	14.2	39
5	Amphisauropus kablikae	MNG-1901	220.5	213.5	164	154.5	62.8	130	112	178	88	90	3.5	30.8	12	19.5	26.8	33	21	9.7	16.7	21.3	23.5	12	51	42.3	51	33	4.32353	3.21569	2.54902	0.352941	3.4902	1.23137	88	90	3.5	30.8	27.3
5	Amphisauropus kablikae	MNG-1902	302.5	303	199	181.7	64.3	131.7	101.3	215	96	109.5	-11.3	15.3	12.5	19.7	30.7	37.5	18	11.3	15	19	26.7	14	71	51	71	37.5	4.26056	2.80282	1.85493	0.428169	3.02817	0.905634	96	109.5	-11.3	15.3	26.6
5	Amphisauropus kablikae	MNG-7813-56	50.5	47	36	31	12.5	25.3	18.7	36.5	86	98.5	-17.3	21.5	1.7	3	4	6	NA	1.7	2	2.8	3.7	1.7	12.5	8.3	12.5	6	4.04	2.88	2.024	0.528	2.92	1	86	98.5	-17.3	21.5	38.8
5	Amphisauropus kablikae	MNG-7813-76	58	55.3	41	37.5	11	26.3	25.8	40	98	99	-12.8	32	2.3	4.8	6.3	10	5	2	3.5	4.8	4.8	3	18	10	18	10	3.22222	2.27778	1.46111	0.0277778	2.22222	0.611111	98	99	-12.8	32	44.8
5	Amphisauropus kablikae	MNG-7813-84	65	64	56	46.5	15.7	45.5	34	47	71	86	1.3	24.5	3	5.3	7.5	8.5	5.5	3	5	4.5	5	2.5	15	12.5	15	8.5	4.33333	3.73333	3.03333	0.766667	3.13333	1.04667	71	86	1.3	24.5	23.2
5	Amphisauropus kablikae	MNG-7901-F1 (JF-20-F1)	99	95	72.5	63	11	52.5	40.5	60	87	100	-16.5	31	5	8	11	NA	NA	4.5	7.5	8	10	-	NA	17	NA	NA	NA	NA	NA	NA	NA	NA	87	100	-16.5	31	47.5
5	Amphisauropus kablikae	MNG-13446	52.2	51	52.6	37	20.5	40.6	26.8	46	58	88.5	-17.3	26.2	2.7	5.2	7	8	NA	2.5	4.2	5.5	5.8	2	15	12	15	8	3.48	3.50667	2.70667	0.92	3.06667	1.36667	58	88.5	-17.3	26.2	43.5
5	Amphisauropus kablikae	MNG-13448	58.5	57.3	42.7	38.8	12.3	31.7	27	40.5	81	93	-0.5	24.6	2.5	4	5	NA	NA	2.5	3.3	4.7	5.5	2.5	NA	10	NA	NA	NA	NA	NA	NA	NA	NA	81	93	-0.5	24.6	25.1
5	Amphisauropus kablikae	MNG-13449	57.7	56.8	39.2	36.1	13.1	26.3	22.9	42	93.2	96.2	-2.3	31.9	3.1	4.8	6	8	4	2.5	4.1	5	5.1	2.5	13.5	10	13.5	8	4.27407	2.9037	1.94815	0.251852	3.11111	0.97037	93.2	96.2	-2.3	31.9	34.2
5	Amphisauropus kablikae	MNG-13450	52.5	55.1	43.6	36.1	13.9	34.8	23	40.9	73.6	100.9	-26	19.6	2.8	4.2	5.4	7.3	NA	2	3.6	4.4	4.8	2.4	12.5	9.6	12.5	7.3	4.2	3.488	2.784	0.944	3.272	1.112	73.6	100.9	-26	19.6	45.6
5	Amphisauropus kablikae	MNG-13453	60.5	58	40	35	13.7	28.5	21.3	44	96	108	-4.8	40	2.5	4.3	5.5	NA	NA	2.3	3.3	4.5	4.5	2.5	NA	11	NA	NA	NA	NA	NA	NA	NA	NA	96	108	-4.8	40	44.8
5	Amphisauropus kablikae	MNG-13455	56.7	56.8	36.7	37.8	15	25.3	23.6	42.5	96	98.5	-8.2	33.2	2.2	3.8	5.2	7.3	3	2	3.3	4.5	5	2.5	12	9	12	7.3	4.725	3.05833	2.10833	0.141667	3.54167	1.25	96	98.5	-8.2	33.2	41.4
5	Amphisauropus kablikae	MNG-13475-F1	75.5	77	51	48.4	7.2	34.8	28.2	45.5	94.5	106.5	-18.7	8.3	2.5	4	5.5	6	NA	2	3	4	4.7	1	NA	10	NA	6	NA	NA	NA	NA	NA	NA	94.5	106.5	-18.7	8.3	27
5	Amphisauropus kablikae	MNG-13475-F2	58.8	59.4	45.8	40.7	8.6	34.5	26.8	38	80.4	95.8	-26.2	24.3	2.5	3.5	5.3	7.5	4	2	3.5	4.3	3.7	2.5	13	9	13	7.5	4.52308	3.52308	2.65385	0.592308	2.92308	0.661538	80.4	95.8	-26.2	24.3	50.5
5	Amphisauropus kablikae	VF-2	66	69	63	51	19	54.5	37.5	50	62	86	-21.7	15	3.3	6.3	8.7	12	6	2.7	4.3	5.5	5.5	2.5	22	15	22	12	3	2.86364	2.47727	0.772727	2.27273	0.863636	62	86	-21.7	15	36.7
5	Amphisauropus kablikae	VF-21	125	122.5	100	87	33.8	76	59.9	98.8	79.9	92.5	-4.9	30.1	5.8	10	14.3	NA	NA	5.2	8.3	12	12.7	5.5	35	25.3	35	NA	3.57143	2.85714	2.17143	0.46	2.82286	0.965714	79.9	92.5	-4.9	30.1	35
5	Amphisauropus kablikae	VF-4382/83	71	74	54.8	51	20.7	43.2	36.8	58	80.5	91.3	-4.7	16.8	4	6.7	9	12	6	3.4	5.7	7.5	7.8	4	20.5	15.7	20.5	12	3.46341	2.67317	2.10732	0.312195	2.82927	1.00976	80.5	91.3	-4.7	16.8	21.5
5	Amphisauropus kablikae	VF-5084	79.7	80	70.5	57	13.8	58.3	40.8	52.3	68.7	90	-31.4	12.8	3	5	8	11	NA	2.5	4	6	6	4	19	13.7	19	11	4.19474	3.71053	3.06842	0.921053	2.75263	0.726316	68.7	90	-31.4	12.8	44.2
5	Amphisauropus kablikae	VF-5163/5166	92	89.5	76	70.7	26.5	61.3	53.3	78	80.5	87	-6	28.3	5	8.8	11.3	13	NA	4	6.3	8.3	10	2	24	17	24	13	3.83333	3.16667	2.55417	0.333333	3.25	1.10417	80.5	87	-6	28.3	34.3
5	Amphisauropus kablikae	VF-5222	99	105	78.7	70.5	25.3	63.7	46.5	77	78.5	101	-14	63.7	4.5	7	10.7	14	NA	3.7	5	6.7	7	4	22	16.5	22	14	4.5	3.57727	2.89545	0.781818	3.5	1.15	78.5	101	-14	63.7	77.7
5	Amphisauropus kablikae	VF-6037/-6057-F1a	55.1	54.2	50.7	40.2	11.2	41.7	29.9	38.6	68.4	86.7	-34.5	8.6	3.3	4.9	7	7.8	3	2.7	3.9	5	5.6	3	13	9	13	7.8	4.23846	3.9	3.20769	0.907692	2.96923	0.861538	68.4	86.7	-34.5	8.6	43.1
5	Amphisauropus kablikae	VF-6037/-6057-F1b	44.5	44.5	45.6	38.3	12.2	40	31.9	35	57.2	70.2	-27.6	14.4	3.9	5	7	NA	NA	2.6	3.5	4	4.6	3.2	14	8.9	14	NA	3.17857	3.25714	2.85714	0.578571	2.5	0.871429	57.2	70.2	-27.6	14.4	42
5	Amphisauropus kablikae	VF-6037/-6057-F2a	61	52	47.5	36.7	13.3	35.5	24	42	76	89.5	-13	23.8	3	4.7	7	8	NA	2	3.5	4.3	5.3	2.7	NA	NA	NA	8	NA	NA	NA	NA	NA	NA	76	89.5	-13	23.8	36.8
5	Amphisauropus kablikae	VF-6037/-6057-F2b	54.4	56.4	49.4	42.1	11.4	41.3	32.3	38.8	70.8	88.9	-37.3	9.3	3.6	5.1	6	7	NA	3	4.3	5	5.1	2.3	NA	9.4	NA	7	NA	NA	NA	NA	NA	NA	70.8	88.9	-37.3	9.3	46.6
5	Amphisauropus kablikae	VF-6037/-6057-F3	42.1	43	44.7	38.4	11.5	39.4	30.4	31.6	56.7	72	-15.7	14.7	3.3	5.3	7	8	NA	2.5	3.6	4.1	5	3	13	9	13	8	3.23846	3.43846	3.03077	0.692308	2.43077	0.884615	56.7	72	-15.7	14.7	30.4
5	Amphisauropus kablikae	VF-6058/-6074-F1	46.2	46.1	48.5	40	11.8	42.8	31.9	34.8	58.7	72.9	-24.6	0.4	3.2	5.6	7.3	9	NA	3.3	4.4	5	5.5	3	14	10.3	14	9	3.3	3.46429	3.05714	0.778571	2.48571	0.842857	58.7	72.9	-24.6	0.4	25
5	Amphisauropus kablikae	VF-6058/-6074-F2	51.9	54	48.4	42.8	9.4	41.6	33.3	35.8	61.2	76.9	-27.1	-5.3	3.5	5.6	7.9	9	NA	3	4.2	5.1	5.2	2.5	NA	9	NA	9	NA	NA	NA	NA	NA	NA	61.2	76.9	-27.1	-5.3	21.8
5	Amphisauropus kablikae	VF-6075/6076-F1	53.4	47.8	45	39.3	15.1	35.5	30.5	41	73.6	77	-24	-8.2	3.4	5.3	7	NA	NA	2.7	4.4	5.5	5.3	3	NA	11	NA	NA	NA	NA	NA	NA	NA	NA	73.6	77	-24	-8.2	15.8
5	Amphisauropus kablikae	VF-6075/6076-F2	46.3	46	48.8	42.6	8.3	44.8	36.4	34	58.8	73.3	-44.5	-17.5	3	4.8	7	NA	NA	2.7	3.8	4.4	5	3	NA	10	NA	NA	NA	NA	NA	NA	NA	NA	58.8	73.3	-44.5	-17.5	27
5	Amphisauropus kablikae	VF-6132/-6159-F1	91.8	93.6	65.8	57	16.9	48.7	31.5	62.8	88.6	111.8	-0.6	1.3	2.8	4.6	6.8	9	NA	2.5	4.5	5.6	6.1	2.8	NA	10.7	NA	9	NA	NA	NA	NA	NA	NA	88.6	111.8	-0.6	1.3	1.9
5	Amphisauropus kablikae	VF-6132/-6159-F2	80	77.5	70	54.7	12.3	57.7	39.7	52.5	69.5	90	-22	12.3	3	5	8	NA	NA	3	4	5.5	5.7	3	NA	12	NA	NA	NA	NA	NA	NA	NA	NA	69.5	90	-22	12.3	34.3
6	Matthewichnus caudifer	Rindsberg/MSC (UCM-1878)	22.2	22.7	21.9	17.7	1.1	18.4	13.7	35.5	61.2	79	24.2	6.9	2.5	4.4	6	8.2	5	1.9	3.1	3.4	1.3	NA	11.3	5.6	11.3	8.2	1.9646	1.93805	1.62832	0.415929	3.14159	2.06195	61.2	79	24.2	6.9	-17.3
6	Matthewichnus caudifer	BR (UCM-469)	44.2	42.9	40.6	32.3	-7	33.1	23.1	57	65.7	87.1	-27.5	-3.5	4.6	7.8	10.1	14.5	9	3.1	4.7	5.3	3.3	NA	18.7	9.3	18.7	14.5	2.36364	2.17112	1.77005	0.534759	3.04813	1.9893	65.7	87.1	-27.5	-3.5	24
6	Matthewichnus caudifer	GB (UCM-060)	35.2	31.5	25.5	22.9	-6.6	18.7	16.9	44.1	87.5	84.8	-17.7	-4.6	3.1	5.1	7.5	8.9	5.9	2.8	5	4.9	2.8	NA	12.8	8	12.8	8.9	2.75	1.99219	1.46094	0.140625	3.44531	2.23438	87.5	84.8	-17.7	-4.6	13.1
7	Matthewichnus caudifer	NMMNH P-23312	26.3	35.7	24.8	24.3	9.2	20.8	16.3	50	67.3	86.7	-17	16	2.6	3.8	6	6.8	3.3	1.8	2.6	3.4	2.3	NA	10.8	7	10.8	6.8	2.43519	2.2963	1.92593	0.416667	4.62963	3.28704	67.3	86.7	-17	16	33
7	Matthewichnus caudifer	NMMNH P-23511	52.3	57.8	49.4	45	31.6	40.4	33.6	102	62	82.5	-5.8	11.5	4	7.3	9.4	11.7	7	3.8	5.4	6.3	3.5	NA	19.3	11.5	19.3	11.7	2.70984	2.55959	2.09326	0.352332	5.28497	4.34715	62	82.5	-5.8	11.5	17.3
8	Ichniotherium praesidentis	DBM 060003309001-4	430.67	428.67	422.95	410.53	265.32	363.26	346.26	480.65	60.94	63.56	-28	-5.11	34.67	49.75	67.13	86.36	70	24.07	34.73	41.56	44.5	28.93	150.33	109.79	150.33	86.36	2.86483	2.81348	2.41642	0.113085	3.1973	1.76492	60.94	63.56	-28	-5.11	22.89
9	Ichniotherium sphaerodactylum	BGR-P-12539-F1	332.7	338.7	221	230.3	125.6	151.3	157	285	91.7	89.3	11.6	23.6	19.3	32	40.5	44.5	35.7	17.7	27.3	32.4	37.4	24.6	92.5	77.3	92.5	44.5	3.59676	2.38919	1.63568	-0.0616216	3.08108	1.35784	91.7	89.3	11.6	23.6	12
9	Ichniotherium sphaerodactylum	BGR-P-12539-F2	316	319	225	209	96.6	158	135.3	255.3	85.7	100		26.3	19	29.3	40.7	46.7	36.5	15.5	27.5	35	42.3	28	90	71.3	90	46.7	3.51111	2.5	1.75556	0.252222	2.83667	1.07333	85.7	100	0	26.3	26.3
9	Ichniotherium sphaerodactylum	BUW-1	350.3	344	251.9	233.3	141.4	180.3	155.2	321	88.2	98.6	6	74.5	14	28	44	46	40	19.5	27	27	34	20	116	80.5	116	46	3.01983	2.17155	1.55431	0.216379	2.76724	1.21897	88.2	98.6	6	74.5	68.5
9	Ichniotherium sphaerodactylum	BUW-2-F1	301.5	318.5	207	221.3	115.3	142	166	269	92.5	84	9	17	NA	NA	38	47	40	20	23	33	36	23	91.3	75.7	91.3	47	3.3023	2.26725	1.55531	-0.26287	2.94633	1.26287	92.5	84	9	17	8
9	Ichniotherium sphaerodactylum	BUW-2-F2	309	330	231	232.5	122.3	171	162.5	278	84	90	20	23.7	28	33	41	46	36	17	24	30.7	36.3	23.7	91	75.7	91	46	3.3956	2.53846	1.87912	0.0934066	3.05495	1.34396	84	90	20	23.7	3.7
9	Ichniotherium sphaerodactylum	FG-525	384.3	372.5	270.8	261.7	130	194.5	181.3	328	90	97	10.4	18.8	23	38.3	50.5	57.3	44.5	17	27.5	43	49	36	123.3	98	123.3	57.3	3.11679	2.19627	1.57745	0.107056	2.66018	1.05434	90	97	10.4	18.8	8.4
9	Ichniotherium sphaerodactylum	HF-51	351.3	357.4	266.1	265	88.4	183.4	187.8	272.5	85.3	84	12	21.1	22	36	43.7	51.5	38.2	17	30.4	37.1	40.4	27	101.8	79.3	101.8	51.5	3.45088	2.61395	1.80157	-0.043222	2.67682	0.868369	85.3	84	12	21.1	9.1
9	Ichniotherium sphaerodactylum	HF-55	348	355.7	228.3	228.8	101.5	152.7	132	274	95	100.7	12.5	21.4	20	34	43.5	47.7	37	15	27	37	43.3	29	97.5	86.7	97.5	47.7	3.56923	2.34154	1.56615	0.212308	2.81026	1.04103	95	100.7	12.5	21.4	8.9
9	Ichniotherium sphaerodactylum	HF-56	342	336.3	232	216.3	124.8	153.3	134	287.5	87.5	98.7	0.3	19.4	23.3	34.3	41.7	39.3	39.3	16.4	28.3	37.6	41.4	30.5	110.3	81.5	110.3	39.3	3.10063	2.10335	1.38985	0.174977	2.60653	1.13146	87.5	98.7	0.3	19.4	19.1
9	Ichniotherium sphaerodactylum	HLMD-WT-297	352.3	349	228.5	224.8	81	144.8	142.6	256.3	100	100	14.2	25	17.7	31.2	39.2	45.4	38	17.8	26	32	37	25.4	88.4	67	88.4	45.4	3.98529	2.58484	1.63801	0.0248869	2.89932	0.91629	100	100	14.2	25	10.8
9	Ichniotherium sphaerodactylum	LMJG-8491	352.7	335.5	264.3	240.5	137.8	198.5	159.5	314	85	92	11	26.8	18.5	29	37	45.5	38.5	21.7	28.3	33	36.7	23.3	105.3	83	105.3	45.5	3.34948	2.50997	1.88509	0.37037	2.98196	1.30864	85	92	11	26.8	15.8
9	Ichniotherium sphaerodactylum	MB.ICV.1	318.3	316.7	255.1	250.9	140.1	202.7	187.4	297.8	76.7	79.5	2.1	17.8	25.5	36.5	44	56.3	40.5	16.7	33.3	36	37	25	109.5	93.3	109.5	56.3	2.90685	2.32968	1.85114	0.139726	2.71963	1.27945	76.7	79.5	2.1	17.8	15.7
9	Ichniotherium sphaerodactylum	MB.ICV.2	290	296.7	221.8	208	130.4	151.3	155.3	274.5	82.7	86.5	-11.5	11.2	20.3	33	41.8	46	36.5	18	28	35	38.7	23.7	92	74	92	46	3.15217	2.41087	1.64457	-0.0434783	2.9837	1.41739	82.7	86.5	-11.5	11.2	22.7
9	Ichniotherium sphaerodactylum	MB.ICV.4	367	367	242.2	253.4	87.4	159.2	178.4	272	98.8	93.5	12.4	33.1	20.5	29.4	37.4	42.6	32.8	16.3	26.7	31.5	35.7	23.3	94.7	73.2	94.7	42.6	3.8754	2.55755	1.6811	-0.202746	2.87223	0.922914	98.8	93.5	12.4	33.1	20.7
9	Ichniotherium sphaerodactylum	MNG-1351	360.1	351.2	240.1	237.9	126.4	160.3	165.6	299.5	96.4	95.2	12	24.8	22.7	33.2	43.6	51.3	38.7	19	28.6	36.6	45.3	28.4	108.5	87	108.5	51.3	3.31889	2.2129	1.47742	-0.0488479	2.76037	1.16498	96.4	95.2	12	24.8	12.8
9	Ichniotherium sphaerodactylum	MNG-1515-F1	313.5	338.4	252.3	239.1	103.3	195.7	176.1	270.9	77.2	88.4	2.5	30.2	22	32.3	42.8	49.2	42	19.4	31.1	36	39.8	25	96.7	79.1	96.7	49.2	3.24199	2.6091	2.02378	0.202689	2.80145	1.06825	77.2	88.4	2.5	30.2	27.7
9	Ichniotherium sphaerodactylum	MNG-1515-F2	340.6	339.9	228	235.6	94.9	148.9	164.7	268.7	96.6	92	5.1	20.4	NA	33	45	49	NA	20	29	35.9	40.8	25.5	93.5	73	93.5	49	3.64278	2.4385	1.59251	-0.168984	2.8738	1.01497	96.6	92	5.1	20.4	15.3
9	Ichniotherium sphaerodactylum	MNG-1515-F3	394.1	407.4	258.1	265.1	73.3	170.4	172.9	277.3	98.4	100.7	9.4	22.7	17	32	41.6	45.3	38.5	NA	28.9	36.5	41	26.4	100.3	84	100.3	45.3	3.92921	2.57328	1.6989	-0.0249252	2.76471	0.730808	98.4	100.7	9.4	22.7	13.3
9	Ichniotherium sphaerodactylum	MNG-1515-F4	374.7	379.2	243.4	254.7	91.1	155.8	171.7	281.8	101.4	95	13.5	32.2	19	34.3	41.8	48.7	39	19.5	30	35.3	39.8	26.5	94.7	NA	94.7	48.7	3.95671	2.57022	1.6452	-0.167899	2.97571	0.961985	101.4	95	13.5	32.2	18.7
9	Ichniotherium sphaerodactylum	MNG-1840-F1	324.7	327	249.5	238.2	112.1	192.2	174.2	272.2	81	88.2	5.6	24.5	25.7	36.1	43	49.9	36.4	24.1	30.3	35.1	38.8	26.2	100.6	79.3	100.6	49.9	3.22763	2.48012	1.91054	0.178926	2.70577	1.11431	81	88.2	5.6	24.5	18.9
9	Ichniotherium sphaerodactylum	MNG-1840-F2	430.8	438.3	288.8	309.8	113.5	194.8	219.6	328.8	93.5	87.5	16.8	24	28.3	39.3	50.5	59.8	50	18	35	45.4	51.2	35.5	111	88	111	59.8	3.88108	2.6018	1.75495	-0.223423	2.96216	1.02252	93.5	87.5	16.8	24	7.2
9	Ichniotherium sphaerodactylum	MNG-2356-15	428.8	428.7	308.4	305	118	218.4	219	332.7	90.5	90	5.8	17.4	28	43.5	54.8	63	46.5	20.8	35	46.3	53	32.3	128.3	95.3	128.3	63	3.34217	2.40374	1.70226	-0.00467654	2.59314	0.919719	90.5	90	5.8	17.4	11.6
9	Ichniotherium sphaerodactylum	MNG-10072	358.5	362.8	275.3	251.7	112.7	211.3	170.4	294.2	81.6	94.6	5.7	30.6	21.4	31.9	39.4	43.9	34.7	29.3	30.2	34	36	22.9	103.3	77.4	103.3	43.9	3.47047	2.66505	2.0455	0.395934	2.84802	1.091	81.6	94.6	5.7	30.6	24.9
9	Ichniotherium sphaerodactylum	MSEO-IIIA-519-F1	347.7	346.3	259	242	129.6	194.3	161.5	305.7	81.7	94.7	3.6	10.2	26.3	35.3	42.8	51	42.8	19.3	30.8	37	40.3	28.8	110	85.3	110	51	3.16091	2.35455	1.76636	0.298182	2.77909	1.17818	81.7	94.7	3.6	10.2	6.6
9	Ichniotherium sphaerodactylum	MSEO-IIIA-519-F2	343.8	333.7	276.4	263.5	141.2	217.8	197.8	311	79.3	77.3	5.2	19.8	24.8	37.2	44.4	51.4	39.6	18.7	27.3	33.3	38.3	26	106	87	106	51.4	3.2434	2.60755	2.05472	0.188679	2.93396	1.33208	79.3	77.3	5.2	19.8	14.6
9	Ichniotherium sphaerodactylum	MSEO-nn-2	326.3	329.3	287	269	170.3	235.5	216	343.5	70.3	73	4.8	14.7	NA	NA	53	NA	NA	25	41	48.7	55.3	41	122.8	95.7	122.8	NA	2.65717	2.33713	1.91775	0.158795	2.79723	1.38681	70.3	73	4.8	14.7	9.9
9	Ichniotherium sphaerodactylum	NHMM-2	389	386.1	259.3	278.1	131.9	175.8	199.3	322.9	95.6	87.3	3.5	29.3	27	39.2	46.8	53	36	24.6	34	41.2	43.6	28.1	105.5	83.6	105.5	53	3.6872	2.45782	1.66635	-0.222749	3.06066	1.25024	95.6	87.3	3.5	29.3	25.8
9	Ichniotherium sphaerodactylum	NHMM-412	306	314	221.3	218.3	108.8	156	145.8	265.5	85	92	4.3	19.8	28	34	44.3	54.5	45	23.3	32.3	39.4	45.2	30.7	121	78.8	121	54.5	2.52893	1.82893	1.28926	0.0842975	2.19421	0.899174	85	92	4.3	19.8	15.5
9	Ichniotherium sphaerodactylum	NHMS-I-Ba-18	388	372	265	221.3	153	180.3	109	326	94	118.5	-7.8	35.3	30	43	56	63.7	51	21.7	33.3	42.8	51	36	117	94	117	63.7	3.31624	2.26496	1.54103	0.609402	2.78632	1.30769	94	118.5	-7.8	35.3	43.1
9	Ichniotherium sphaerodactylum	NHMS-1312	438	440	278	264	102	171.5	128.5	337	107	118	-6.3	38	22.5	31.5	47.5	61.5	43	17	26	39	44.3	30	122	94	122	61.5	3.59016	2.27869	1.40574	0.352459	2.7623	0.836066	107	118	-6.3	38	44.3
9	Ichniotherium sphaerodactylum	NHMW-1963-565	359.5	358.6	257.1	275.2	119.1	186.2	204.5	301.9	87.7	83.4	12.9	24.2	21.6	31.4	38.7	45.8	36.7	23	30.8	37.9	39.2	28.4	105.3	83.6	105.3	45.8	3.41406	2.4416	1.76828	-0.173789	2.86705	1.13105	87.7	83.4	12.9	24.2	11.3
9	Ichniotherium sphaerodactylum	PMJ-P-1321-F2 (= JP-2-F2)	406.5	423	310.7	277.3	128	226	188.7	340	87.5	96.5	2.7	24.7	24	32	42	53	44	19.3	32.3	37.5	44	29.7	111	87.3	111	53	3.66216	2.7991	2.03604	0.336036	3.06306	1.15315	87.5	96.5	2.7	24.7	22
9	Ichniotherium sphaerodactylum	SMMGD-1354	306.3	320	273.8	286	143.7	225	195	360	72.3	83	-9.3	25.7	23.3	36	48	61.7	50.5	21.5	30	34.3	41.3	27.7	104	79.3	104	61.7	2.94519	2.63269	2.16346	0.288462	3.46154	1.38173	72.3	83	-9.3	25.7	35
10	Ichniotherium cottae	BU 2471	392.5	389.3	254.2	273	88.3	161.6	187.6	284.3	102.3	92	-12.3	4.2	23.4	33.7	44.5	54	30.8	19.8	26.8	35.3	47.7	25	117.8	79	117.8	54	3.33192	2.15789	1.37182	-0.220713	2.41341	0.749576	102.3	92	-12.3	4.2	16.5
11	Ichniotherium cottae	CMNH VP-3052	543	534	361	334.5	168	234.7	202.5	440	97.5	108	-11.8	25.3	39.7	46	63.3	74	39.7	27.3	37	47.3	55.3	28.3	148.7	112	148.7	74	3.65165	2.42771	1.57835	0.216543	2.95898	1.12979	97.5	108	-11.8	25.3	37.1
11	Ichniotherium cottae	OSU 16553	533	538.3	398.9	386.9	79.4	293.7	280.3	352	87	89.6	-32.6	5.9	38.6	57.4	79.8	86	NA	31.6	46	57.1	66.9	NA	157.9	99.1	157.9	86	3.37555	2.52628	1.86004	0.0848638	2.22926	0.50285	87	89.6	-32.6	5.9	38.5
12	Ichniotherium cottae	DMNS 50618	464.5	461	284	297.7	99.8	165	184.3	320	101	94.5	-8.5	11.3	27	37.7	54.3	66	35.7	22.5	29.8	44.3	57	30.3	130.7	97	130.7	66	3.55394	2.17292	1.26243	-0.147666	2.44836	0.763581	101	94.5	-8.5	11.3	19.8
12	Ichniotherium cottae	DMNS 50622	410	405.5	297.3	314	89.5	212	241.3	302	88.5	81.5	0.5	9.5	25.7	40.8	55.3	67.7	39	20	34.5	48.3	57	30	113	91	113	67.7	3.62832	2.63097	1.87611	-0.259292	2.67257	0.792035	88.5	81.5	0.5	9.5	9
12	Ichniotherium cottae	DMNS 55056	225.4	263.3	168.8	197.8	90	125.3	154.3	210.7	91.6	100	-9.4	24.8	19.8	29.6	41.3	51.3	26.6	14	23.3	31	36	16.7	84.6	59.8	84.6	51.3	2.6643	1.99527	1.48109	-0.34279	2.49054	1.06383	91.6	100	-9.4	24.8	34.2
13	Ichniotherium cottae	MNG-2047	357.5	355	213.7	229.3	75.8	124	151.3	256	107	96.5	8.3	22.3	NA	NA	NA	NA	NA	NA	NA	NA	NA	NA	77.3	NA	77.3	NA	4.62484	2.76455	1.60414	-0.353169	3.31177	0.980595	107	96.5	8.3	22.3	14
13	Ichniotherium cottae	MNG-2049	375	409	276	296	219.3	202.5	206	317	86	86	3.7	40.3	24.5	35.5	48	58	28	24.7	29.3	39	44.7	22.3	125	84.3	125	58	3	2.208	1.62	-0.028	2.536	1.7544	86	86	3.7	40.3	36.6
13	Ichniotherium cottae	NHMS AP-244-19	217.5	211.5	140.7	139.3	39.8	97.3	94.7	149	101	101	3.8	17.5	13.3	21.7	26.5	34	16	11	18	20	24	NA	63	NA	63	34	3.45238	2.23333	1.54444	0.0412698	2.36508	0.631746	101	101	3.8	17.5	13.7
13	Ichniotherium cottae	NHMS P-418	240.3	234.6	168.3	167.5	49.3	122.7	117.2	168.2	89.7	90.4	13.6	22.2	14.6	23.4	28.6	35.6	18.2	12	15.5	22	27	NA	65	51	65	35.6	3.69692	2.58923	1.88769	0.0846154	2.58769	0.758462	89.7	90.4	13.6	22.2	8.6
13	Ichniotherium cottae	MNG-1386-F1	404	437	305	325	121.5	227.5	238.5	300	85	84	14	31	36	47.3	60.3	72	NA	25	35.5	45	52	NA	133	92	133	72	3.03759	2.29323	1.71053	-0.0827068	2.25564	0.913534	85	84	14	31	17
14	Ichniotherium cottae	MNG-1352	456	441	254	251.5	51.7	113	122.5	276	129	124	22	30.3	17	33.3	43.3	51	23.7	13.5	30.5	40	46	23	84	76	84	51	5.42857	3.02381	1.34524	-0.113095	3.28571	0.615476	129	124	22	30.3	8.3
14	Ichniotherium cottae	MNG-1819	303	300	182.5	182.5	48.7	103	103.5	199	111	111	-2.3	20.3	13	19.5	27	37.5	18	11	20.5	26.5	30.5	15.5	71	55	71	37.5	4.26761	2.57042	1.4507	-0.00704225	2.80282	0.685915	111	111	-2.3	20.3	22.6
14	Ichniotherium cottae	MNG-2356-16-F1	366.3	366.3	222.8	222.8	34.4	128.3	125.8	219.7	110	110.7	3	25.5	16	26	35	42.3	NA	13	26	32.3	40.7	22.5	72.3	68	72.3	42.3	5.06639	3.0816	1.77455	0.0345781	3.03873	0.475795	110	110.7	3	25.5	22.5
14	Ichniotherium cottae	MNG-2356-16-F2	407.3	401.5	244.3	238.3	45	134.8	128.3	246.5	113	115.5	7	16.5	16.7	28.3	37	43	NA	12	27	30	40.5	NA	73	67	73	43	5.57945	3.34658	1.84658	0.0890411	3.37671	0.616438	113	115.5	7	16.5	9.5
14	Ichniotherium cottae	MNG-10179	289	306.7	218.8	195	79.4	169.3	116.8	231.7	82.7	105	-2.6	20	12	26	34.5	40	17	11.3	21.7	29.7	36	22	80	61.5	80	40	3.6125	2.735	2.11625	0.65625	2.89625	0.9925	82.7	105	-2.6	20	22.6
14	Ichniotherium cottae	MSEO-I-36	272	260.5	227	219.7	80	181.3	171.7	233.5	90	87	2.8	26.3	17.5	30	35.3	42	NA	15	20.5	27	34	17	78.7	60.5	78.7	42	3.45616	2.88437	2.30368	0.121982	2.96696	1.01652	90	87	2.8	26.3	23.5
14	Ichniotherium cottae	PMJ P-1321-F3	312	343.5	219.3	202.7	60.5	146	113	225	95	112.5	13	33.5	16	26.7	34.5	42	21	12	26	32.5	40.5	16	66	57	66	42	4.72727	3.32273	2.21212	0.5	3.40909	0.916667	95	112.5	13	33.5	20.5
14	Ichniotherium cottae	SSB-1	349.5	356	222.3	197.3	45.5	124.7	83	226.5	110	132	9	26.8	16.7	26.7	37.3	47.7	24	13.7	25.3	35.3	40.3	22.7	78	63	78	47.7	4.48077	2.85	1.59872	0.534615	2.90385	0.583333	110	132	9	26.8	17.8
14	Ichniotherium cottae	UGKU 130-F1	343.7	350.8	203.3	229.4	73.6	110	148.8	248	115	99	17.2	20.8	15.3	26	36.5	43.4	23.3	13	26	33.5	38.7	20.5	83	61.3	83	43.4	4.14096	2.4494	1.3253	-0.46747	2.98795	0.886747	115	99	17.2	20.8	3.6
14	Ichniotherium cottae	UGKU 130-F2	384	392.2	243.2	241	61	152	137.2	252.8	103.3	108.8	16.4	21.4	15	27.5	36	47.5	21.3	13	27.5	36	42	25	81.5	65.5	81.5	47.5	4.71166	2.98405	1.86503	0.181595	3.10184	0.748466	103.3	108.8	16.4	21.4	5
14	Ichniotherium cottae	MB.ICV.3-F1	371.2	358.5	225.2	219.8	46.7	132.7	120.3	231	110	112	13.6	30.3	14	25.8	35.3	42.8	21	15.5	25.3	29.6	34.5	17	73	61	73	42.8	5.08493	3.08493	1.81781	0.169863	3.16438	0.639726	110	112	13.6	30.3	16.7
14	Ichniotherium cottae	MB.ICV.3-F2	327	335	203	195.5	64	119	104	233	111	115	9.7	21.5	14.3	25.7	35	42.8	21	15.5	25.3	29.6	34.5	17	73	NA	73	42.8	4.47945	2.78082	1.63014	0.205479	3.19178	0.876712	111	115	9.7	21.5	11.8
15	Dimetropus isp.	DBM 060003260001-5	300.3	292.9	253.6	237.9	143.7	191.8	191.2	290.8	71.2	74.6	-2.6	0.7	33.6	43.3	57.8	72.7	49.5	21.2	34.9	46.3	46.6	25.8	140.3	95.9	140.3	72.7	2.14041	1.80756	1.36707	0.00427655	2.0727	1.02423	71.2	74.6	-2.6	0.7	3.3
16	Tambachichnium schmidti	MNG-1828-F1	685	619.5	359.5	343	-158.5	166.3	146.3	276.333	122	129.5	1	7.3	NA	NA	NA	58	27	NA	NA	NA	NA	NA	93	NA	93	58	7.36559	3.86559	1.78817	0.215054	2.97133	-1.7043	122	129.5	1	7.3	6.3
16	Tambachichnium schmidti	PMJ-P-1321-F1	396	388	231	225.5	-85.7	118	117.5	175.633	123	124	-14.7	-4	NA	28	39	54	NA	NA	27	39	52	24	76	NA	76	54	5.21053	3.03947	1.55263	0.00657895	2.31096	-1.12763	123	124	-14.7	-4	10.7
16	Tambachichnium schmidti	VF-14	272	266.5	164.7	189.7	46.3	88.7	134.3	225.8	110	88.5	-9	2.3	NA	NA	NA	NA	NA	NA	NA	NA	NA	NA	NA	NA	NA	NA	NA	NA	NA	NA	NA	NA	110	88.5	-9	2.3	11.3
17	Dimetropus leisnerianus	MNG-1762	296	289.7	210	200.8	129	154.5	134.8	287.5	82	85.7	0.8	-5.4	23.3	30.5	31	42.5	34.5	20	23.8	32	39.3	22	78	71	78	42.5	3.79487	2.69231	1.98077	0.252564	3.6859	1.65385	82	85.7	0.8	-5.4	-6.2
17	Dimetropus leisnerianus	MNG-1823-F1	314.3	316.3	197	219.3	88.8	111.5	151.3	245.3	104.3	91	-9.8	-7.7	23	31.7	34	43.3	31	18.8	23.3	34	-	18	88.8	NA	88.8	43.3	3.53941	2.21847	1.25563	-0.448198	2.76239	1	104.3	91	-9.8	-7.7	2.1
17	Dimetropus leisnerianus	MNG-1823-F2	317	312.4	203	220.2	86.6	126.4	152.8	241.8	101	89	-7.4	3	18.8	28.6	35.8	36.8	25.3	14.3	26.3	28	33	21.5	66.8	57	66.8	36.8	4.74551	3.03892	1.89222	-0.39521	3.61976	1.29641	101	89	-7.4	3	10.4
17	Dimetropus leisnerianus	MNG-1823-F3	292.5	298.3	256	233.3	81.5	198.7	154	269.5	85.5	97.5	0	3.3	23	30.3	35.5	40.5	NA	18.7	25	30.3	35.6	27	90	65.5	90	40.5	3.25	2.84444	2.20778	0.496667	2.99444	0.905556	85.5	97.5	0	3.3	3.3
17	Dimetropus leisnerianus	MNG-1823-F4	282.9	270.3	229.8	209.9	128.3	179.3	159	264.3	75.3	80.1	-9.9	-4.1	22	27	30.5	41	27.8	17.3	23.4	29.7	39	22.8	79.6	68	79.6	41	3.55402	2.88693	2.25251	0.255025	3.32035	1.61181	75.3	80.1	-9.9	-4.1	5.8
17	Dimetropus leisnerianus	MNG-1828-F2	267.3	263.4	172.9	189.2	89	113	137	221.4	95.8	87.1	-5.5	-0.5	18	24.8	29.7	33.5	26.8	15.8	25.4	30.9	35.7	22	67	57.3	67	33.5	3.98955	2.5806	1.68657	-0.358209	3.30448	1.32836	95.8	87.1	-5.5	-0.5	5
17	Dimetropus leisnerianus	MNG-“Gas-Bach”	343.2	341.4	209.6	219.3	65.3	122.9	138.5	237.2	108.3	101.4	0.9	6.4	22.8	25.8	31.9	40.1	32.6	22.5	26.3	32.3	40.1	26	86	72.4	86	40.1	3.9907	2.43721	1.42907	-0.181395	2.75814	0.759302	108.3	101.4	0.9	6.4	5.5
17	Dimetropus leisnerianus	NHMW-2003Z0030	263.5	261.5	182.7	192	89.8	135.3	130	211	79	82.5	-9.8	-25	21	30.5	35	42.5	33	NA	NA	28	NA	26	92	NA	92	42.5	2.86413	1.98587	1.47065	0.0576087	2.29348	0.976087	79	82.5	-9.8	-25	-15.2
18	Erpetopus willistoni	NMMNH P-32478	100	85	65.5	55.5	8.7	41.5	35.5	55	100	99	14	19.7	4	5.7	9	11	5	3	3.7	6.7	9	3	14	11	14	11	7.14286	4.67857	2.96429	0.428571	3.92857	0.621429	100	99	14	19.7	5.7
18	Erpetopus willistoni	NMMNH P-32487	111.5	115	66.7	65.3	-5.5	36.3	31.7	51	114	122	16.8	23.7	3.5	4.8	7.5	9.8	3	2.5	3.5	5	8	3.3	13	10	13	9.8	8.57692	5.13077	2.79231	0.353846	3.92308	-0.423077	114	122	16.8	23.7	6.9
18	Erpetopus willistoni	NMMNH P-32400	91.5	92.8	62.6	53.2	6	44	27	52.5	92	118.5	-40	35.7	3.5	5	7	9	NA	2	3.2	4.8	6	2.3	11	9.7	11	9	8.31818	5.69091	4	1.54545	4.77273	0.545455	92	118.5	-40	35.7	75.7
18	Erpetopus willistoni	NMMNH P-32411	85	84	57	52.5	5.3	37	30	48	98	109	17.7	39	3.7	4.7	6.7	9.3	4	3	4	5.3	7.3	3	11	9	11	9.3	7.72727	5.18182	3.36364	0.636364	4.36364	0.481818	98	109	17.7	39	21.3
18	Erpetopus willistoni	NMMNH P-40196	96	97	61.5	57.5	3	39	30	51	102	117	27.3	40.3	3	4.3	7	9.7	3.5	2	3	5.3	7.3	2	12	9	12	9.7	8	5.125	3.25	0.75	4.25	0.25	102	117	27.3	40.3	13
18	Erpetopus willistoni	NMMNH P-46905	86	87	57.7	49.7	8.8	38.3	25	53	95.5	120	-17.7	34.5	3.5	6	8	9.5	NA	3.5	4.5	5.8	7.8	3.3	NA	9.8	NA	9.5	NA	NA	NA	NA	NA	NA	95.5	120	-17.7	34.5	52.2
19	Varanopus microdactylus	MNG-1841	122.5	117.5	95	90.7	38.8	71.7	65.7	101.5	90.5	90.5	-1	9.7	9.5	13.7	17.3	20.3	11.8	6.5	9.7	11.3	12.8	9	30	20	30	20.3	4.08333	3.16667	2.39	0.2	3.38333	1.29333	90.5	90.5	-1	9.7	10.7
19	Varanopus microdactylus	MNG-2052	120.5	119.9	78.3	70.4	25.5	50.4	37.2	85	99.3	115.5	-0.5	13.1	6.4	11.1	14.1	18.2	13.3	6.3	9.1	13.1	16.4	8.4	27.3	24.1	27.3	18.2	4.41392	2.86813	1.84615	0.483516	3.11355	0.934066	99.3	115.5	-0.5	13.1	13.6
19	Varanopus microdactylus	MNG-10083	99.6	98.1	72	68.9	28.8	49	44.6	77.6	88	92.6	-11.7	8.7	5.7	9.5	12	14.5	11	5	8	10	11.7	6.8	21	15.5	21	14.5	4.74286	3.42857	2.33333	0.209524	3.69524	1.37143	88	92.6	-11.7	8.7	20.4
19	Varanopus microdactylus	PMJ-P-1322 (= JP-1)	89.4	92.7	72.4	72	29.5	57.8	52.6	74.5	74.1	81.3	13	8.8	7.2	12	15.6	17.8	13.5	6.9	9.6	12.2	13.9	7.8	25	18.4	25	17.8	3.576	2.896	2.312	0.208	2.98	1.18	74.1	81.3	13	8.8	-4.2
19	Varanopus microdactylus	SFM-7	185	190	104	110	17.7	47.5	54.5	109	124	120	-12.3	-10	11	14.5	19	21	14	7	11.7	15.5	17.3	10	29	24.5	29	21	6.37931	3.58621	1.63793	-0.241379	3.75862	0.610345	124	120	-12.3	-10	2.3
20	Hyloidichnus bifurcatus	USNM 11518	169.3	151	114	110	54	73.8	71	136.5	95.7	105	17.2	28.8	12.3	21	26.6	32.8	15	9.8	16.5	23	25.3	10.7	43	33.3	43	32.8	3.93721	2.65116	1.71628	0.0651163	3.17442	1.25581	95.7	105	17.2	28.8	11.6
20	Hyloidichnus bifurcatus	Lodeve ohne Nr.	310	331	240	216	94.7	171.5	140.5	252	84	103	4	13	26.5	38.5	48	66	25	19	30.5	39	48	27	85	67	85	66	3.64706	2.82353	2.01765	0.364706	2.96471	1.11412	84	103	4	13	9
20	Hyloidichnus bifurcatus	Lodeve 54 L	181.5	181	118.3	114.5	35.3	77	78.5	126	99	99	25.5	36.3	10.3	17.3	22	27.5	14	10.5	15.3	19.3	21.3	11	38	27	38	27.5	4.77632	3.11316	2.02632	-0.0394737	3.31579	0.928947	99	99	25.5	36.3	10.8
21	Notalacerta missouriensis	NMMNH P-31705	74.7	75	52.3	54.4	19.4	19.2	19.7	55.7	91.3	87	4.6	5.8	5.8	8.8	11.8	14.8	10.5	3.7	6.7	10	12	6	23	16	23	14.8	3.24783	2.27391	0.834783	-0.0217391	2.42174	0.843478	91.3	87	4.6	5.8	1.2
21	Notalacerta missouriensis	NMMNH P-31746	74.3	77.2	45	48.5	21.4	26.8	29	58.7	107.3	103.4	11.2	9.7	5.8	9.3	11.8	15.8	10.8	4.2	6.7	9.7	12.2	6.8	21	15	21	15.8	3.5381	2.14286	1.27619	-0.104762	2.79524	1.01905	107.3	103.4	11.2	9.7	-1.5
21	Notalacerta missouriensis	NMMNH P-31759	71.1	71.4	45.8	47.1	24.8	28.9	29.3	59.8	102.4	100.7	5	8.3	5.7	8.8	12.1	16.1	10	3.7	6	9.5	12	5.8	19.8	15	19.8	16.1	3.59091	2.31313	1.4596	-0.020202	3.0202	1.25253	102.4	100.7	5	8.3	3.3
22	Dromopus lacertoides	FG-250-8-17/31/33	158.5	130.3	84.3	79	44.5	67	44.8	100	73.5	110.3	-24.3	14.4	8	15	22	31	13	5	7	13	23	9	38	27	38	31	4.17105	2.21842	1.76316	0.584211	2.63158	1.17105	73.5	110.3	-24.3	14.4	38.7
22	Dromopus lacertoides	JF-1	91.7	90.5	61.5	59.6	11.8	41.8	36	57	96.7	103.3	-20	25.8	6.5	8.7	13.5	20	9.3	NA	6.3	8.7	13.3	NA	25	NA	25	20	3.668	2.46	1.672	0.232	2.28	0.472	96.7	103.3	-20	25.8	45.8
22	Dromopus lacertoides	JF-11	102.3	104	62.3	58	12	36.5	25.5	61	108.3	128	-8.8	13.8	6	8	12	18.3	9	NA	8	12	16.5	8	NA	NA	NA	18.3	NA	NA	NA	NA	NA	NA	108.3	128	-8.8	13.8	22.6
22	Dromopus lacertoides	JF-31	162	158.3	103.7	115	45.3	68	78	124	98	135	0.8	27.4	9.3	14	20.3	32	18	8.5	12	18	26.5	12.5	44.3	36	44.3	32	3.65688	2.34086	1.53499	-0.225734	2.7991	1.02257	98	135	0.8	27.4	26.6
22	Dromopus lacertoides	JF-35	77	64.7	49.5	40.3	11	31.5	26.3	43.5	101	104	-11.7	12.6	4.3	6.3	9.7	14	4	3	5	7.6	11.4	5	NA	NA	NA	14	NA	NA	NA	NA	NA	NA	101	104	-11.7	12.6	24.3
22	Dromopus lacertoides	JF-50-2	40.5	42	36	31.3	6.5	28.3	23.3	30	82	96	-12	10	3.5	4.3	7	10.3	4	NA	4	5	9	NA	NA	NA	NA	10.3	NA	NA	NA	NA	NA	NA	82	96	-12	10	22
22	Dromopus lacertoides	JF-61-F1	63.7	64	42.8	37.8	10.8	29.5	20.3	43.3	94	115.3	-6	14.2	NA	NA	NA	NA	NA	NA	NA	NA	NA	NA	NA	NA	NA	NA	NA	NA	NA	NA	NA	NA	94	115.3	-6	14.2	20.2
22	Dromopus lacertoides	JF-61-F2	43	30.3	32	28.7	17	22.8	18	40.5	85.7	111	-19	12	NA	NA	NA	NA	NA	NA	NA	NA	NA	NA	NA	NA	NA	NA	NA	NA	NA	NA	NA	NA	85.7	111	-19	12	31
22	Dromopus lacertoides	JF-62-F1	66.8	67.2	45.3	43.3	16.7	30.9	26.8	49.5	94.3	103	-33	3.8	4.8	7	12	15.3	NA	NA	4.3	7.5	10.7	5	NA	NA	NA	15.3	NA	NA	NA	NA	NA	NA	94.3	103	-33	3.8	36.8
22	Dromopus lacertoides	JF-62-F2	59.3	58.5	41	38.3	11.5	27.5	22.7	41	94.3	103	-32	5.5	4	5.8	8.3	12.3	4.5	3	4	6.3	9.3	4	NA	NA	NA	12.3	NA	NA	NA	NA	NA	NA	94.3	103	-32	5.5	37.5
22	Dromopus lacertoides	JF-149	74	63	52.5	46.5	22.3	38	34	56	90	85	-20	-1	5.5	8	11.7	19.3	8.5	NA	6	10.3	15.3	6.5	NA	NA	NA	19.3	NA	NA	NA	NA	NA	NA	90	85	-20	-1	19
22	Dromopus lacertoides	MB.ICV.22	235.5	238	151	137.3	27.8	89	66.7	143.5	107.5	123.5	2.5	18.3	13	16.3	20.3	36.3	20	NA	15	18	25.3	-	55	NA	55	36.3	4.28182	2.74545	1.61818	0.405455	2.60909	0.505455	107.5	123.5	2.5	18.3	15.8
22	Dromopus lacertoides	MNG-2005-F1	70.5	70	60	56.2	32	46.8	40	69.8	76	82	-7	13.8	7.2	11	15	23	10.3	NA	7.8	12.3	19.2	8	30	NA	30	23	2.35	2	1.56	0.226667	2.32667	1.06667	76	82	-7	13.8	20.8
22	Dromopus lacertoides	MNG-2005-F2	148	155	109.5	107	27.7	80.5	72	108	92	102	-5.3	-2.8	12.7	21	24	34	15	NA	13.7	18.7	28.7	12	47	NA	47	34	3.14894	2.32979	1.71277	0.180851	2.29787	0.589362	92	102	-5.3	-2.8	2.5
22	Dromopus lacertoides	MNG-13436	112	127	96	100	27.7	78.5	81	97	72	91	-14.7	5.7	11.3	16	23.3	37	15.7	NA	11.5	17.3	27.3	17	47.7	NA	47.7	37	2.34801	2.01258	1.6457	-0.0524109	2.03354	0.580713	72	91	-14.7	5.7	20.4
22	Dromopus lacertoides	MNG-13442-F1a	67	66.5	48.5	48.7	18.7	32.5	29.7	52.5	118	111.5	-27.8	11.8	4.3	6.3	10.3	15	6.7	NA	4.7	7	11.7	6.7	23	17	23	15	2.91304	2.1087	1.41304	0.121739	2.28261	0.813043	118	111.5	-27.8	11.8	39.6
22	Dromopus lacertoides	MNG-13442-F1b	61	69	46.5	45.5	11.7	33	29.5	47	92	111	-39.7	7.7	4.3	6.3	11.7	16	6.3	NA	4.3	7	12.3	5	NA	NA	NA	16	NA	NA	NA	NA	NA	NA	92	111	-39.7	7.7	47.4
22	Dromopus lacertoides	NHMS-AP-28-7 (= AF-9b)	25.7	24.3	20	22	6.6	15	18.5	18	80	66.7	-28.6	-7.6	1.8	3.2	4.8	6.6	2.7	1	2.3	3.3	5.3	2	8	NA	8	6.6	3.2125	2.5	1.875	-0.4375	2.25	0.825	80	66.7	-28.6	-7.6	21
22	Dromopus lacertoides	VF-1	104.5	105	76.3	66.8	15.5	55.7	42.5	69.5	96	102.7	-0.8	14.6	8.7	11.7	15.3	22.3	11.3	NA	9.3	12	18.7	NA	31	NA	31	22.3	3.37097	2.46129	1.79677	0.425806	2.24194	0.5	96	102.7	-0.8	14.6	15.4
22	Dromopus lacertoides	VF-2010	208	228	133.5	139	34	82.5	79.3	141	105	110	-14.3	7	13.5	19.5	28	39.5	18.5	NA	12.5	19.5	25	NA	58.5	NA	58.5	39.5	3.55556	2.28205	1.41026	0.0547009	2.41026	0.581197	105	110	-14.3	7	21.3
22	Dromopus lacertoides	VF-2049-F1	217	220	141.3	146.3	37.3	93.7	94.3	149	101.5	97	-14.3	12.3	NA	22	29	37	21	NA	NA	NA	NA	NA	NA	NA	NA	37	NA	NA	NA	NA	NA	NA	101.5	97	-14.3	12.3	26.6
22	Dromopus lacertoides	VF-2049-F2	195	197	129	122.5	42.7	81.5	74	143	103	109	-20	4	NA	NA	NA	NA	NA	NA	NA	23	33	NA	NA	NA	NA	NA	NA	NA	NA	NA	NA	NA	103	109	-20	4	24
22	Dromopus lacertoides	VF-2051-F1	192.7	182.3	113	111.5	22.2	66	68.3	117.7	111	106	-9.4	14.6	7	13.7	24.7	35.3	NA	NA	12	19.3	28.3	NA	46	NA	46	35.3	4.18913	2.45652	1.43478	-0.05	2.5587	0.482609	111	106	-9.4	14.6	24
22	Dromopus lacertoides	VF-2051-F2	214	215	134.5	130.5	21	81	74	128	106	112	-5.3	16	NA	17	25	34.3	NA	NA	10	18.5	28	NA	NA	NA	NA	34.3	NA	NA	NA	NA	NA	NA	106	112	-5.3	16	21.3
22	Dromopus lacertoides	VF-2091	223	244	152.5	135.5	21.7	88.5	124.5	144	109	126	-8	15	NA	NA	NA	NA	NA	NA	NA	NA	NA	NA	NA	NA	NA	NA	NA	NA	NA	NA	NA	NA	109	126	-8	15	23
22	Dromopus lacertoides	VF-2112/13	205	190	152.5	162	51.3	115	125.5	153	84	71	-18.3	5.3	NA	NA	NA	NA	NA	NA	NA	NA	NA	NA	NA	NA	NA	NA	NA	NA	NA	NA	NA	NA	84	71	-18.3	5.3	23.6
22	Dromopus lacertoides	VF-4272-1	200.3	193	120	127.7	25.3	69.8	80.7	122	109.3	97	-16.4	-3.8	13	20	29.5	42	23	NA	14	24	35.5	16	NA	NA	NA	42	NA	NA	NA	NA	NA	NA	109.3	97	-16.4	-3.8	12.6
22	Dromopus lacertoides	VF-4272-2	113.8	116.1	75	71.9	19.5	46.6	43.3	76.7	102	109.7	-7.3	7.1	7	11	16.4	23	10	4	7.7	13.5	18.9	7	NA	NA	NA	23	NA	NA	NA	NA	NA	NA	102	109.7	-7.3	7.1	14.4
22	Dromopus lacertoides	VF-4443	85.3	82	57.5	56	23	38.8	35.5	62	95.7	93	0.6	0.7	6	9	15	23	13	4	8	11.7	16.3	8	NA	NA	NA	23	NA	NA	NA	NA	NA	NA	95.7	93	0.6	0.7	0.1
22	Dromopus lacertoides	VF-4489	48	48.5	30.5	30	5.3	19.5	16	31	104	114	-8	-6.5	3	5.5	7.5	10.5	4	NA	4	6	8.5	NA	13	NA	13	10.5	3.69231	2.34615	1.5	0.269231	2.38462	0.407692	104	114	-8	-6.5	1.5
